# Supplementary material for: AI-Predicted mTOR Inhibitor Reduces Cancer Cell Proliferation and Extends the Lifespan of C. elegans
Source: Int J Mol Sci. 2023 Apr 25;24(9):7850. doi: 10.3390/ijms24097850 (PMC10177929; doi:10.3390/ijms24097850)
Supplement: Supplementary file 1 [file ijms-24-07850-s001.zip › Supplementary_Table_S1_mtor_inhibitor.xlsx]

## Sheet: MTOR_0
		SMILES
		CCNC(=O)Nc1ccc(-c2nc3c(c(N4CCOCC4)n2)COC3)cc1
Pa	Pi	Activity					Pa	Pi	Predicted toxicity
0,826	0,004	Prostate cancer treatment					0,745	0,073	Twitching
0,797	0,002	mTOR inhibitor					0,385	0,142	Galactorrhea
0,665	0,008	Gastrin inhibitor					0,312	0,165	Retroperitoneal fibrosis
0,589	0,047	Antineoplastic					0,339	0,196	Multiple organ failure
0,479	0,021	Antineoplastic (breast cancer)					0,254	0,199	Extrapyramidal effect
0,448	0,034	Heat shock protein 27 antagonist					0,276	0,223	Anorexiant
0,301	0,004	Phosphatidylinositol kinase inhibitor					0,262	0,219	Fibrosis, interstitial
0,319	0,035	Imidazoline I1 receptor agonist
0,285	0,004	Phosphatidylinositol 3-kinase inhibitor
0,358	0,099	Antiarthritic
0,282	0,035	Antineoplastic enhancer
0,246	0,003	Phosphatidylinositol 3-kinase alpha inhibitor
0,261	0,027	Interleukin agonist
0,252	0,039	RET inhibitor
0,274	0,068	Rheumatoid arthritis treatment
0,272	0,068	DNA synthesis inhibitor
0,297	0,105	MAP3K5 inhibitor
0,235	0,054	Cyclic GMP phosphodiesterase inhibitor
0,249	0,068	TRKB antagonist
0,310	0,142	Chemosensitizer
0,171	0,005	Phosphatidylinositol 3-kinase stimulant
0,398	0,237	Phobic disorders treatment
0,197	0,037	Heart failure treatment
0,241	0,082	Adenosine regulator
0,156	0,007	Protein kinase B inhibitor
0,181	0,040	Cytokine production inhibitor
0,160	0,025	Fibroblast growth factor 2 antagonist
0,275	0,141	HMGCS2 expression enhancer
0,223	0,089	Antineoplastic (brain cancer)
0,152	0,020	Neuropeptide Y antagonist
0,144	0,017	Fibroblast growth factor 3 antagonist
0,245	0,120	Cardiotonic
0,140	0,016	Interleukin 12 agonist
0,144	0,021	Female sexual dysfunction treatment
0,219	0,098	Chloride channel activator
0,253	0,132	Inotropic
0,145	0,024	Neuropeptide antagonist
0,153	0,033	Topoisomerase II inhibitor
0,140	0,020	Fibroblast growth factor antagonist
0,127	0,007	Protein-tyrosine phosphatase 2C inhibitor
0,192	0,076	Growth factor agonist
0,274	0,161	Insulysin inhibitor
0,233	0,120	Immunomodulator
0,220	0,109	Proto-oncogene tyrosine-protein kinase Fgr inhibitor
0,157	0,050	Restless leg syndrome treatment
0,143	0,038	Neuropeptide Y1 antagonist
0,122	0,018	Fibroblast growth factor 1 antagonist
0,246	0,149	Autoimmune disorders treatment
0,327	0,231	General pump inhibitor
0,212	0,117	Antineoplastic (bone cancer)
0,119	0,031	Platelet activating factor beta antagonist
0,200	0,118	Channel-conductance-controlling ATPase inhibitor
0,101	0,019	CC chemokine receptor antagonist
0,104	0,022	Sulfonylureas
0,085	0,005	Phosphatidylinositol 3-kinase gamma inhibitor
0,085	0,005	Acetyl-CoA transferase inhibitor
0,122	0,043	Interleukin 2 antagonist
0,087	0,009	Bulimia treatment
0,130	0,051	Vasculitis treatment
0,275	0,197	Platelet derived growth factor receptor kinase inhibitor
0,205	0,128	Angiogenesis inhibitor
0,187	0,113	Protein-tyrosine kinase p55(blk) inhibitor
0,115	0,041	MAP kinase kinase 7 inhibitor
0,175	0,101	CYP2D6 inhibitor
0,105	0,031	Chemokine receptor antagonist
0,123	0,051	Insulin secretagoues
0,081	0,009	Integrin alphaVbeta1 antagonist
0,135	0,066	Antiprotozoal (Babesia)
0,115	0,050	Proto-oncogene tyrosine-protein kinase Kit inhibitor
0,079	0,014	Epoxide hydrolase inhibitor
0,140	0,082	Neuropeptide agonist
0,249	0,191	Neurodegenerative diseases treatment
0,116	0,062	Bruton tyrosine kinase inhibitor
0,175	0,124	Imidazoline receptor agonist
0,084	0,033	Platelet activating factor alpha antagonist
0,065	0,019	Vanilloid 1 antagonist
0,253	0,207	Spasmolytic, urinary
0,124	0,080	Bacterial efflux pump inhibitor
0,218	0,174	Raynaud's phenomenon treatment
0,132	0,088	Aurora-C kinase inhibitor
0,099	0,059	Stem cell growth factor agonist
0,105	0,068	Ephrin antagonist
0,101	0,065	Antifungal enhancer
0,042	0,007	Purinergic P2Y12 antagonist
0,136	0,101	Protein kinase inhibitor
0,208	0,173	Antineoplastic (small cell lung cancer)
0,068	0,035	Purinergic P2T antagonist
0,053	0,023	Spermine antagonist
0,193	0,164	Cyclic AMP modulator
0,161	0,134	Ribonucleoside triphosphate reductase inhibitor
0,049	0,022	Phosphatidylinositol 3-kinase beta inhibitor
0,031	0,005	DNA topoisomerase IV inhibitor
0,124	0,099	Antianemic
0,081	0,057	Tyrosine-protein kinase receptor FLT3 inhibitor
0,244	0,220	Antiinflammatory
0,044	0,024	Purinergic P2Y antagonist
0,177	0,158	Platelet aggregation inhibitor
0,153	0,134	Interleukin 6 antagonist
0,104	0,086	Hyperprolactinemia treatment
0,029	0,011	Acetyl-CoA transferase 1 inhibitor
0,059	0,043	Protocollagen prolyl hydroxylase inhibitor
0,054	0,039	Platelet growth factor antagonist
0,052	0,037	Adenosine A2a receptor antagonist
0,162	0,147	Pancreatic disorders treatment
0,024	0,010	Epoxide hydrolase 2 inhibitor
0,189	0,176	Hematopoietic inhibitor
0,108	0,095	Myocardial infarction treatment
0,106	0,095	Sleep disorders treatment
0,117	0,107	Tyrosine kinase inhibitor
0,133	0,123	Antineoplastic (glioma)
0,190	0,183	Antiasthmatic
0,088	0,085	Growth factor antagonist
0,048	0,046	Phosphatidylinositol 3-kinase delta inhibitor
0,051	0,050	Protein kinase B beta inhibitor

## Sheet: MTOR_1
		SMILES
		CCNC(=O)Nc1ccc(-c2nc3c(c(N4CCOCC4C)n2)COC3)cc1
Pa	Pi	Activity
0,868	0,002	mTOR inhibitor						Pa	Pi	Predicted toxicity
0,867	0,003	Prostate cancer treatment						0,480	0,204	Twitching
0,655	0,034	Antineoplastic						0,305	0,219	Hyperglycemic
0,541	0,015	Antineoplastic (breast cancer)
0,525	0,054	Gastrin inhibitor
0,459	0,058	Antineoplastic (non-Hodgkin's lymphoma)
0,344	0,003	Phosphatidylinositol kinase inhibitor
0,331	0,003	Phosphatidylinositol 3-kinase inhibitor
0,347	0,035	Rheumatoid arthritis treatment
0,383	0,082	Heat shock protein 27 antagonist
0,341	0,040	DNA synthesis inhibitor
0,358	0,071	CDK9/cyclin T1 inhibitor
0,275	0,003	Phosphatidylinositol 3-kinase alpha inhibitor
0,296	0,043	Imidazoline I1 receptor agonist
0,283	0,046	Systemic lupus erythematosus treatment
0,258	0,058	CYP3A4 inhibitor
0,300	0,100	Autoimmune disorders treatment
0,200	0,003	Phosphatidylinositol 3-kinase stimulant
0,208	0,019	Topoisomerase II inhibitor
0,189	0,014	Restless leg syndrome treatment
0,151	0,009	MAP kinase kinase 7 inhibitor
0,216	0,076	Antineoplastic enhancer
0,197	0,085	RET inhibitor
0,135	0,026	Female sexual dysfunction treatment
0,127	0,021	Pyruvate dehydrogenase kinase inhibitor
0,270	0,166	Neurodegenerative diseases treatment
0,262	0,161	Antiarthritic
0,137	0,038	Proto-oncogene tyrosine-protein kinase Kit inhibitor
0,225	0,129	Immunomodulator
0,137	0,043	Fibroblast growth factor 2 antagonist
0,102	0,012	Protein-tyrosine phosphatase 2C inhibitor
0,135	0,045	Bacterial efflux pump inhibitor
0,210	0,121	Proto-oncogene tyrosine-protein kinase Fgr inhibitor
0,106	0,024	Protein kinase B inhibitor
0,118	0,040	Fibroblast growth factor 3 antagonist
0,140	0,065	Heart failure treatment
0,116	0,049	Hedgehog signaling inhibitor
0,204	0,140	Adenosine regulator
0,134	0,070	Sleep disorders treatment
0,076	0,013	Integrin alphaVbeta1 antagonist
0,068	0,007	Phosphatidylinositol 3-kinase gamma inhibitor
0,090	0,031	Sulfonylureas
0,116	0,060	Hyperprolactinemia treatment
0,194	0,142	Cyclic GMP phosphodiesterase inhibitor
0,101	0,051	Neuropeptide Y antagonist
0,060	0,009	Acetyl-CoA transferase inhibitor
0,153	0,103	Interleukin agonist
0,092	0,042	Fibroblast growth factor antagonist
0,093	0,045	Chemokine receptor antagonist
0,126	0,081	Cytokine production inhibitor
0,079	0,034	CC chemokine receptor antagonist
0,086	0,042	Fibroblast growth factor 1 antagonist
0,113	0,073	Vasculitis treatment
0,247	0,207	P-glycoprotein substrate
0,095	0,057	Interleukin 12 agonist
0,177	0,138	Antidiarrheal
0,051	0,015	Bulimia treatment
0,238	0,202	HMGCS2 expression enhancer
0,092	0,057	Neuropeptide antagonist
0,055	0,021	Cytokine production stimulant
0,033	0,005	DNA topoisomerase IV inhibitor
0,170	0,143	Protein-tyrosine kinase p55(blk) inhibitor
0,026	0,005	Antibiotic Naphthyridine-like
0,138	0,117	Male reproductive disfunction treatment
0,035	0,020	Purinergic P2Y12 antagonist
0,211	0,198	Raynaud's phenomenon treatment
0,095	0,085	Antifungal enhancer
0,024	0,015	Antibiotic Quinolone-like
0,030	0,022	DNA gyrase inhibitor
0,066	0,058	Platelet activating factor beta antagonist
0,101	0,094	Interleukin 2 antagonist
0,290	0,284	General pump inhibitor
0,038	0,033	Phosphatidylinositol 3-kinase beta inhibitor
0,042	0,038	Spermine antagonist
0,108	0,107	Neuropeptide Y1 antagonist

## Sheet: MTOR_4
		SMILES
		CCNC(=O)Nc1ccc(-c2nc3c(c(N4CCOCC4C)n2)COCC3)cc1
Pa	Pi	Activity
0,852	0,003	Prostate cancer treatment						Pa	Pi	Predicted toxicity
0,825	0,002	mTOR inhibitor						0,372	0,245	Twitching
0,652	0,035	Antineoplastic						0,176	0,130	Hypoglycemic
0,514	0,018	Antineoplastic (breast cancer)
0,447	0,067	Antineoplastic (non-Hodgkin's lymphoma)
0,325	0,003	Phosphatidylinositol kinase inhibitor
0,312	0,003	Phosphatidylinositol 3-kinase inhibitor
0,380	0,086	Heat shock protein 27 antagonist
0,307	0,030	Systemic lupus erythematosus treatment
0,346	0,080	CDK9/cyclin T1 inhibitor
0,266	0,003	Phosphatidylinositol 3-kinase alpha inhibitor
0,317	0,062	Immunomodulator
0,296	0,043	Imidazoline I1 receptor agonist
0,282	0,062	DNA synthesis inhibitor
0,325	0,116	Neurodegenerative diseases treatment
0,259	0,057	CYP3A4 inhibitor
0,191	0,004	Phosphatidylinositol 3-kinase stimulant
0,188	0,014	Neuropeptide antagonist
0,259	0,090	Antiparkinsonian
0,181	0,020	Restless leg syndrome treatment
0,219	0,072	Antineoplastic enhancer
0,173	0,026	Topoisomerase II inhibitor
0,157	0,019	Neuropeptide Y antagonist
0,148	0,010	MAP kinase kinase 7 inhibitor
0,294	0,163	Chemosensitizer
0,310	0,192	Gastrin inhibitor
0,145	0,034	Proto-oncogene tyrosine-protein kinase Kit inhibitor
0,124	0,024	Pyruvate dehydrogenase kinase inhibitor
0,146	0,059	Heart failure treatment
0,106	0,021	Sulfonylureas
0,172	0,095	Chronic obstructive pulmonary disease treatment
0,127	0,053	Fibroblast growth factor 2 antagonist
0,203	0,131	Proto-oncogene tyrosine-protein kinase Fgr inhibitor
0,210	0,138	Alzheimer's disease treatment
0,176	0,106	RET inhibitor
0,346	0,276	Nootropic
0,257	0,187	P-glycoprotein substrate
0,125	0,056	Vasculitis treatment
0,199	0,130	Rheumatoid arthritis treatment
0,071	0,008	Cytokine production stimulant
0,111	0,051	Fibroblast growth factor 3 antagonist
0,074	0,015	Integrin alphaVbeta1 antagonist
0,065	0,008	Phosphatidylinositol 3-kinase gamma inhibitor
0,115	0,062	Hyperprolactinemia treatment
0,125	0,076	Bacterial efflux pump inhibitor
0,108	0,061	Hedgehog signaling inhibitor
0,179	0,133	Antidiarrheal
0,099	0,056	Female sexual dysfunction treatment
0,124	0,083	Cytokine production inhibitor
0,120	0,080	Neuropeptide Y1 antagonist
0,060	0,022	Vanilloid 1 antagonist
0,145	0,113	Interleukin agonist
0,092	0,061	Interleukin 12 agonist
0,194	0,165	Adenosine regulator
0,113	0,084	Myocardial infarction treatment
0,081	0,054	Fibroblast growth factor antagonist
0,078	0,052	Fibroblast growth factor 1 antagonist
0,195	0,169	Catenin beta inhibitor
0,043	0,018	Bulimia treatment
0,031	0,005	DNA topoisomerase IV inhibitor
0,046	0,020	Acetyl-CoA transferase inhibitor
0,233	0,211	HMGCS2 expression enhancer
0,194	0,174	Antineoplastic (bone cancer)
0,187	0,166	Cyclic GMP phosphodiesterase inhibitor
0,124	0,104	Irritable Bowel syndrome treatment
0,212	0,193	Raynaud's phenomenon treatment
0,025	0,006	Antibiotic Naphthyridine-like
0,032	0,016	DNA gyrase inhibitor
0,102	0,087	Insulin secretagoues
0,034	0,023	Purinergic P2Y12 antagonist
0,183	0,175	Ophthalmic drug
0,173	0,166	Cytochrome P450 inhibitor
0,038	0,033	Phosphatidylinositol 3-kinase beta inhibitor
0,100	0,096	Interleukin 2 antagonist
0,162	0,159	Protein-tyrosine kinase p55(blk) inhibitor
0,023	0,021	Acetyl-CoA transferase 1 inhibitor
0,130	0,129	Antineoplastic (glioma)
0,040	0,040	Spermine antagonist

## Sheet: MTOR_7
		SMILES
		CNC(=O)Nc1ccc(-c2nc3c(c(N4CCOCC4C)n2)COC3)cc1
Pa	Pi	Activity						Pa	Pi	Predicted toxicity
0,893	0,001	mTOR inhibitor						0,512	0,096	Hyperglycemic
0,877	0,003	Prostate cancer treatment						0,393	0,236	Twitching
0,687	0,028	Antineoplastic
0,538	0,015	Antineoplastic (breast cancer)
0,393	0,003	Phosphatidylinositol kinase inhibitor
0,381	0,003	Phosphatidylinositol 3-kinase inhibitor
0,464	0,088	Gastrin inhibitor
0,378	0,028	Rheumatoid arthritis treatment
0,310	0,002	Phosphatidylinositol 3-kinase alpha inhibitor
0,384	0,081	Heat shock protein 27 antagonist
0,356	0,072	CDK9/cyclin T1 inhibitor
0,391	0,116	Antineoplastic (non-Hodgkin's lymphoma)
0,306	0,040	Imidazoline I1 receptor agonist
0,343	0,078	Autoimmune disorders treatment
0,282	0,042	CYP3A4 inhibitor
0,212	0,003	Phosphatidylinositol 3-kinase stimulant
0,266	0,071	DNA synthesis inhibitor
0,260	0,066	Systemic lupus erythematosus treatment
0,303	0,130	Antiarthritic
0,153	0,008	MAP kinase kinase 7 inhibitor
0,279	0,137	HMGCS2 expression enhancer
0,216	0,076	Antineoplastic enhancer
0,160	0,030	Topoisomerase II inhibitor
0,275	0,158	P-glycoprotein substrate
0,164	0,050	Heart failure treatment
0,162	0,055	Sleep disorders treatment
0,126	0,022	Pyruvate dehydrogenase kinase inhibitor
0,118	0,016	Protein kinase B inhibitor
0,328	0,230	General pump inhibitor
0,105	0,011	Protein-tyrosine phosphatase 2C inhibitor
0,133	0,040	Proto-oncogene tyrosine-protein kinase Kit inhibitor
0,172	0,082	Interleukin agonist
0,123	0,033	Female sexual dysfunction treatment
0,133	0,049	Bacterial efflux pump inhibitor
0,149	0,065	Restless leg syndrome treatment
0,113	0,033	TRKA antagonist
0,201	0,133	Proto-oncogene tyrosine-protein kinase Fgr inhibitor
0,072	0,006	Phosphatidylinositol 3-kinase gamma inhibitor
0,107	0,041	Interleukin 12 agonist
0,103	0,040	Tyrosine-protein kinase receptor antagonist
0,174	0,118	TRKB antagonist
0,110	0,058	Hedgehog signaling inhibitor
0,114	0,065	Insulin secretagoues
0,178	0,129	Protein-tyrosine kinase p55(blk) inhibitor
0,192	0,148	Cyclic GMP phosphodiesterase inhibitor
0,218	0,174	Raynaud's phenomenon treatment
0,237	0,195	MAP3K5 inhibitor
0,145	0,104	Antimycoplasmal
0,200	0,159	Immunomodulator
0,054	0,014	Bulimia treatment
0,067	0,028	Integrin alphaVbeta1 antagonist
0,049	0,016	Acetyl-CoA transferase inhibitor
0,051	0,020	Phosphatidylinositol 3-kinase beta inhibitor
0,083	0,057	Chemokine receptor antagonist
0,069	0,044	CC chemokine receptor antagonist
0,027	0,005	Antibiotic Naphthyridine-like
0,097	0,077	Antifungal enhancer
0,105	0,085	Fibroblast growth factor 2 antagonist
0,088	0,071	Neuropeptide Y antagonist
0,251	0,235	Platelet derived growth factor receptor kinase inhibitor
0,077	0,061	Fibroblast growth factor antagonist
0,051	0,040	Phosphatidylinositol 3-kinase delta inhibitor
0,024	0,015	Antibiotic Quinolone-like
0,022	0,014	DNA topoisomerase IV inhibitor
0,070	0,064	Fibroblast growth factor 1 antagonist
0,146	0,140	RET inhibitor
0,116	0,111	Ca2+/calmodulin-dependent kinase I inhibitor

## Sheet: MTOR_13
		SMILES
		CNC(=O)Nc1ccc(-c2nc3c(c(N4CCOCC4C)n2)COCC3)cc1
Pa	Pi	Activity						Pa	Pi	Predicted toxicity
0,861	0,003	Prostate cancer treatment						0,433	0,132	Hyperglycemic
0,851	0,002	mTOR inhibitor						0,303	0,280	Twitching
0,682	0,029	Antineoplastic
0,510	0,018	Antineoplastic (breast cancer)
0,372	0,003	Phosphatidylinositol kinase inhibitor
0,359	0,003	Phosphatidylinositol 3-kinase inhibitor
0,381	0,084	Heat shock protein 27 antagonist
0,293	0,002	Phosphatidylinositol 3-kinase alpha inhibitor
0,305	0,040	Imidazoline I1 receptor agonist
0,344	0,081	CDK9/cyclin T1 inhibitor
0,289	0,041	Systemic lupus erythematosus treatment
0,376	0,131	Antineoplastic (non-Hodgkin's lymphoma)
0,281	0,042	CYP3A4 inhibitor
0,288	0,077	Immunomodulator
0,202	0,003	Phosphatidylinositol 3-kinase stimulant
0,220	0,072	Antineoplastic enhancer
0,150	0,009	MAP kinase kinase 7 inhibitor
0,284	0,145	P-glycoprotein substrate
0,154	0,021	Neuropeptide antagonist
0,173	0,047	Heart failure treatment
0,272	0,146	HMGCS2 expression enhancer
0,291	0,168	Chemosensitizer
0,221	0,115	Cytochrome P450 inhibitor
0,218	0,112	Rheumatoid arthritis treatment
0,141	0,036	Proto-oncogene tyrosine-protein kinase Kit inhibitor
0,131	0,028	Neuropeptide Y antagonist
0,221	0,117	DNA synthesis inhibitor
0,123	0,025	Pyruvate dehydrogenase kinase inhibitor
0,251	0,168	Analgesic
0,126	0,044	Topoisomerase II inhibitor
0,259	0,179	Neurodegenerative diseases treatment
0,215	0,139	Antiparkinsonian
0,319	0,243	General pump inhibitor
0,124	0,049	Insulin secretagoues
0,109	0,037	TRKA antagonist
0,163	0,092	Interleukin agonist
0,230	0,166	Autoimmune disorders treatment
0,069	0,007	Phosphatidylinositol 3-kinase gamma inhibitor
0,141	0,083	Restless leg syndrome treatment
0,103	0,046	Interleukin 12 agonist
0,099	0,044	Tyrosine-protein kinase receptor antagonist
0,194	0,143	Proto-oncogene tyrosine-protein kinase Fgr inhibitor
0,127	0,078	Orexin receptor 1 antagonist
0,219	0,172	Raynaud's phenomenon treatment
0,124	0,082	Bacterial efflux pump inhibitor
0,133	0,093	Irritable Bowel syndrome treatment
0,151	0,116	Chronic obstructive pulmonary disease treatment
0,065	0,033	Integrin alphaVbeta1 antagonist
0,160	0,128	TRKB antagonist
0,142	0,111	Antimycoplasmal
0,102	0,072	Hedgehog signaling inhibitor
0,050	0,021	Phosphatidylinositol 3-kinase beta inhibitor
0,045	0,017	Bulimia treatment
0,231	0,205	MAP3K5 inhibitor
0,073	0,047	Sulfonylureas
0,170	0,144	Protein-tyrosine kinase p55(blk) inhibitor
0,026	0,005	Antibiotic Naphthyridine-like
0,050	0,031	Cytokine production stimulant
0,088	0,075	Female sexual dysfunction treatment
0,185	0,173	Cyclic GMP phosphodiesterase inhibitor
0,051	0,040	Phosphatidylinositol 3-kinase delta inhibitor
0,192	0,182	Antineoplastic (bone cancer)
0,158	0,150	Mood disorders treatment
0,184	0,177	Alzheimer's disease treatment
0,116	0,109	Ca2+/calmodulin-dependent kinase I inhibitor
0,094	0,089	Antifungal enhancer
0,021	0,017	DNA topoisomerase IV inhibitor
0,154	0,151	Antidepressant
0,040	0,038	Vanilloid 1 antagonist
0,191	0,190	Catenin beta inhibitor

## Sheet: MTOR_20
		SMILES
		CCNC(=O)Nc1ccc(-c2nc(N3CCOCC3)c3cnn(CC)c3n2)cc1
Pa	Pi	Activity				Pa	Pi	Predicted toxicity
0,719	0,004	Prostate cancer treatment				0,562	0,171	Twitching
0,644	0,002	Phosphatidylinositol kinase inhibitor
0,633	0,002	Phosphatidylinositol 3-kinase inhibitor
0,574	0,002	mTOR inhibitor
0,561	0,002	Phosphatidylinositol 3-kinase alpha inhibitor
0,556	0,009	Antiparkinsonian
0,556	0,017	Cyclic AMP phosphodiesterase inhibitor
0,542	0,023	Neurodegenerative diseases treatment
0,518	0,029	Nucleotide metabolism regulator
0,492	0,072	Gastrin inhibitor
0,443	0,037	Antiasthmatic
0,440	0,037	Heat shock protein 27 antagonist
0,388	0,005	Adenosine A2a receptor antagonist
0,375	0,014	Chronic obstructive pulmonary disease treatment
0,360	0,005	Adenosine receptor antagonist
0,403	0,051	Rhinitis treatment
0,380	0,034	Immunomodulator
0,399	0,053	Antiallergic
0,332	0,005	Adenosine A2 receptor antagonist
0,359	0,047	Angiogenesis inhibitor
0,319	0,020	Antieczematic atopic
0,274	0,003	Phosphatidylinositol 3-kinase gamma inhibitor
0,339	0,080	Autoimmune disorders treatment
0,305	0,052	Rheumatoid arthritis treatment
0,241	0,008	Adenosine A3 receptor antagonist
0,354	0,124	Antineoplastic
0,276	0,048	TRKB antagonist
0,311	0,089	MAP3K5 inhibitor
0,215	0,004	Phosphatidylinositol 3-kinase beta inhibitor
0,367	0,161	Proteasome ATPase inhibitor
0,309	0,105	HMGCS2 expression enhancer
0,208	0,012	Ephrin antagonist
0,255	0,065	Imidazoline I1 receptor agonist
0,222	0,034	MAP kinase 1 inhibitor
0,189	0,010	Adenosine A1 receptor antagonist
0,251	0,078	Platelet aggregation inhibitor
0,175	0,007	Constipation treatment
0,187	0,020	Gastrointestinal disorders treatment
0,224	0,059	Antidiarrheal
0,222	0,061	RET inhibitor
0,246	0,086	DNA synthesis inhibitor
0,209	0,053	Erectile dysfunction treatment
0,223	0,069	Antineoplastic enhancer
0,246	0,094	Ophthalmic drug
0,171	0,020	Fibroblast growth factor 2 antagonist
0,151	0,007	Adenosine A2b receptor antagonist
0,202	0,059	Interleukin agonist
0,160	0,020	Platelet activating factor beta antagonist
0,151	0,014	Fibroblast growth factor 3 antagonist
0,205	0,069	GABA receptor agonist
0,173	0,038	Src kinase inhibitor
0,284	0,151	Insulysin inhibitor
0,221	0,091	Antineoplastic (brain cancer)
0,214	0,087	Signal transduction pathways inhibitor
0,142	0,017	Gastroesophageal reflux disease treatment
0,128	0,004	Phosphatidylinositol 3-kinase delta inhibitor
0,160	0,037	Guanylate cyclase stimulant
0,184	0,061	Tyrosine kinase inhibitor
0,192	0,070	Protein kinase inhibitor
0,156	0,036	Protein-tyrosine kinase (PTK, not ETK, WZC) inhibitor
0,145	0,027	Insulin secretagoues
0,132	0,015	Phosphodiesterase II inhibitor
0,152	0,035	Abl kinase inhibitor
0,137	0,021	Fibroblast growth factor antagonist
0,136	0,021	Phosphodiesterase I inhibitor
0,143	0,029	Phosphodiesterase inhibitor
0,172	0,063	GABA C receptor antagonist
0,186	0,082	Growth factor agonist
0,115	0,012	Potassium channel (Ca-activated) blocker
0,165	0,063	Aurora-C kinase inhibitor
0,118	0,020	Fibroblast growth factor 1 antagonist
0,122	0,025	Aurora-A kinase inhibitor
0,107	0,010	Gastric emptying disorders treatment
0,129	0,035	Phosphatidylinositol 3-kinase stimulant
0,193	0,104	Protein-tyrosine kinase p55(blk) inhibitor
0,131	0,042	Vascular endothelial growth factor antagonist
0,122	0,034	Aurora kinase inhibitor
0,211	0,126	Adenosine regulator
0,109	0,026	Hematinic
0,202	0,119	Cyclic GMP phosphodiesterase inhibitor
0,094	0,013	EphB4 antagonist
0,115	0,035	c-Src kinase inhibitor
0,174	0,094	Transplant rejection treatment
0,134	0,054	Ribosomal protein S6 kinase, 70-kDa inhibitor
0,102	0,024	Platelet activating factor alpha antagonist
0,112	0,036	Interleukin 12 agonist
0,120	0,047	Proto-oncogene tyrosine-protein kinase Kit inhibitor
0,102	0,029	TIE antagonist
0,122	0,054	Bruton tyrosine kinase inhibitor
0,087	0,019	Phosphodiesterase V inhibitor
0,102	0,039	Vascular endothelial growth factor 2 antagonist
0,204	0,142	Antineoplastic (bone cancer)
0,205	0,144	Pulmonary hypertension treatment
0,094	0,033	TIE-2 antagonist
0,260	0,200	CDK9/cyclin T1 inhibitor
0,117	0,060	Ribosomal protein S6 kinase inhibitor
0,094	0,037	Protein kinase B inhibitor
0,073	0,016	Integrin alphaVbeta1 antagonist
0,141	0,086	Guanylate cyclase 1 stimulant
0,132	0,076	Cytokine production inhibitor
0,196	0,141	Proto-oncogene tyrosine-protein kinase Fgr inhibitor
0,095	0,042	Vascular endothelial growth factor 1 antagonist
0,107	0,056	Topoisomerase II inhibitor
0,113	0,062	Interleukin 2 antagonist
0,087	0,037	Protein kinase (Mos, Mil/Raf, MEKK, RIPK, TESK, LIMK, IRAK, ILK, Activin/TGF-beta) inhibitor
0,081	0,033	Phosphodiesterase IV inhibitor
0,095	0,048	Tyrosine-protein kinase receptor FLT3 inhibitor
0,106	0,060	MAP kinase kinase 7 inhibitor
0,196	0,152	Vasodilator
0,102	0,057	Stem cell growth factor agonist
0,083	0,039	Raf kinase inhibitor
0,098	0,055	Platelet activating factor antagonist
0,102	0,061	Vascular endothelial growth factor 3 antagonist
0,073	0,034	Aurora-B kinase inhibitor
0,053	0,014	Proto-oncogene tyrosine-protein kinase c-hck inhibitor
0,078	0,041	Sulfonylureas
0,141	0,107	Protein kinase (CK1) inhibitor
0,133	0,102	Restless leg syndrome treatment
0,188	0,159	p21-activated kinase 1 inhibitor
0,047	0,019	Acetyl-CoA transferase inhibitor
0,061	0,032	Platelet growth factor antagonist
0,127	0,100	Irritable Bowel syndrome treatment
0,053	0,026	Vanilloid 1 antagonist
0,031	0,005	DNA-dependent protein kinase inhibitor
0,057	0,032	Protein kinase B beta inhibitor
0,100	0,075	Growth factor antagonist
0,037	0,013	Purinergic P2Y12 antagonist
0,112	0,088	Bcr-Abl kinase inhibitor
0,037	0,014	Phosphodiesterase 6B inhibitor
0,089	0,068	Neuropeptide Y antagonist
0,051	0,030	Raf kinase B inhibitor
0,028	0,007	DNA topoisomerase IV inhibitor
0,185	0,164	Cognition disorders treatment
0,074	0,055	Rho-associated kinase I inhibitor
0,107	0,089	Ribosomal protein S6 kinase 1, 70-kDa inhibitor
0,136	0,119	Antineoplastic (glioma)
0,100	0,084	Epidermal growth factor receptor kinase inhibitor
0,101	0,086	Protein-serine-threonine kinase inhibitor
0,028	0,013	Acetyl-CoA transferase 1 inhibitor
0,123	0,110	Tumour necrosis factor alpha release inhibitor
0,056	0,048	Phosphodiesterase 4A inhibitor
0,246	0,239	Chemosensitizer
0,055	0,050	Phosphodiesterase 5A inhibitor
0,155	0,151	Ribonucleoside triphosphate reductase inhibitor
0,031	0,027	Bulimia treatment
0,068	0,064	Diacylglycerol O-acyltransferase inhibitor
0,040	0,036	Purinergic P2Y antagonist
0,074	0,071	Hepatocyte growth factor antagonist
0,066	0,065	Phosphodiesterase 3A inhibitor
0,084	0,083	Female sexual dysfunction treatment

## Sheet: MTOR_33
		SMILES
		CNC(=O)Nc1ccc(-c2nc(N3CCOCC3)c3nn(C(C)C)cc3n2)cc1
Pa	Pi	Activity						No predicted toxic effects
0,564	0,020	Neurodegenerative diseases treatment
0,544	0,009	Antiparkinsonian
0,490	0,011	Prostate cancer treatment
0,478	0,003	mTOR inhibitor
0,440	0,003	Phosphatidylinositol kinase inhibitor
0,425	0,003	Phosphatidylinositol 3-kinase inhibitor
0,424	0,047	Heat shock protein 27 antagonist
0,412	0,040	CDK9/cyclin T1 inhibitor
0,292	0,003	Phosphatidylinositol 3-kinase gamma inhibitor
0,302	0,031	TRKB antagonist
0,299	0,042	Protein kinase inhibitor
0,259	0,006	Ephrin antagonist
0,248	0,003	Phosphatidylinositol 3-kinase beta inhibitor
0,321	0,079	MAP3K5 inhibitor
0,237	0,003	Phosphatidylinositol 3-kinase alpha inhibitor
0,320	0,095	HMGCS2 expression enhancer
0,219	0,011	Adenosine receptor antagonist
0,255	0,065	Imidazoline I1 receptor agonist
0,195	0,008	Insulin secretagoues
0,196	0,011	Adenosine A2a receptor antagonist
0,227	0,043	Interleukin agonist
0,321	0,140	Antineoplastic
0,188	0,010	Adenosine A2 receptor antagonist
0,185	0,012	Protein kinase (Mos, Mil/Raf, MEKK, RIPK, TESK, LIMK, IRAK, ILK, Activin/TGF-beta) inhibitor
0,196	0,024	Protein-tyrosine kinase (PTK, not ETK, WZC) inhibitor
0,376	0,206	Antiischemic, cerebral
0,192	0,024	Abl kinase inhibitor
0,245	0,077	Signal transduction pathways inhibitor
0,171	0,005	EphB4 antagonist
0,176	0,011	Raf kinase inhibitor
0,177	0,020	Ribosomal protein S6 kinase, 90-kDa inhibitor
0,225	0,069	Cyclic GMP phosphodiesterase inhibitor
0,150	0,003	Phosphatidylinositol 3-kinase delta inhibitor
0,167	0,024	MAP kinase inhibitor
0,143	0,017	TRKA antagonist
0,158	0,043	Src kinase inhibitor
0,164	0,049	Cytokine production inhibitor
0,134	0,021	Tyrosine-protein kinase receptor antagonist
0,130	0,021	Interleukin 12 agonist
0,113	0,008	Raf kinase B inhibitor
0,221	0,117	Angiogenesis inhibitor
0,157	0,055	Guanylate cyclase 1 stimulant
0,149	0,050	Protein-serine-threonine kinase inhibitor
0,196	0,099	Antineoplastic enhancer
0,123	0,029	p38 MAP kinase inhibitor
0,110	0,024	Purinergic receptor antagonist
0,106	0,022	Purinergic P2 antagonist
0,126	0,044	Vascular endothelial growth factor antagonist
0,204	0,123	Platelet aggregation inhibitor
0,114	0,035	c-Src kinase inhibitor
0,212	0,134	Cognition disorders treatment
0,131	0,056	Ca2+/calmodulin-dependent kinase I inhibitor
0,220	0,146	Cardiotonic
0,078	0,005	Proto-oncogene tyrosine-protein kinase c-hck inhibitor
0,125	0,053	Ribosomal protein S6 kinase inhibitor
0,111	0,039	Interleukin 1b antagonist
0,148	0,078	Tyrosine kinase inhibitor
0,271	0,203	Platelet derived growth factor receptor kinase inhibitor
0,122	0,055	Bruton tyrosine kinase inhibitor
0,119	0,055	Phosphatidylinositol 3-kinase stimulant
0,134	0,072	Heart failure treatment
0,105	0,047	Neuropeptide Y antagonist
0,169	0,114	RET inhibitor
0,131	0,078	Guanylate cyclase stimulant
0,200	0,149	Cyclic AMP modulator
0,140	0,089	Tumour necrosis factor alpha release inhibitor
0,194	0,145	Proto-oncogene tyrosine-protein kinase Fgr inhibitor
0,097	0,049	Attention deficit/hyperactivity disorder treatment
0,091	0,044	Vascular endothelial growth factor 2 antagonist
0,174	0,129	p21-activated kinase inhibitor
0,159	0,115	Growth factor agonist
0,083	0,042	Lassitude treatment
0,041	0,004	DNA-dependent protein kinase inhibitor
0,092	0,057	Neuropeptide antagonist
0,167	0,134	Thiol protease inhibitor
0,109	0,077	Fibroblast growth factor 2 antagonist
0,094	0,065	Stem cell growth factor agonist
0,081	0,054	Fibroblast growth factor antagonist
0,064	0,039	Integrin alphaVbeta1 antagonist
0,073	0,049	Aurora-A kinase inhibitor
0,099	0,075	Fibroblast growth factor 3 antagonist
0,184	0,162	Antineoplastic (brain cancer)
0,149	0,128	Interleukin antagonist
0,036	0,015	Purinergic P2Y12 antagonist
0,076	0,055	Fibroblast growth factor 1 antagonist
0,144	0,124	Sodium channel blocker
0,107	0,087	Vasculitis treatment
0,179	0,161	Focal adhesion kinase inhibitor
0,125	0,109	p21-activated kinase 4 inhibitor
0,103	0,086	Interleukin 2 antagonist
0,100	0,084	Epidermal growth factor receptor kinase inhibitor
0,075	0,060	Gastric emptying disorders treatment
0,086	0,071	Phosphodiesterase I inhibitor
0,117	0,103	Aurora-C kinase inhibitor
0,094	0,080	Growth factor antagonist
0,042	0,030	Purinergic P2Y antagonist
0,034	0,024	Bulimia treatment
0,130	0,121	MAP kinase 1 inhibitor
0,079	0,070	Nav1.4 sodium channel blocker
0,056	0,053	Raf kinase C inhibitor
0,208	0,206	Raynaud's phenomenon treatment
0,043	0,041	Adenosine A1 receptor antagonist
0,047	0,045	Purinergic P2X antagonist
0,005	0,005	Ribosomal protein S6 kinase, 90kD, polypeptide 5 inhibitor

## Sheet: MTOR_42
		SMILES
		CNC(=O)Nc1ccc(-c2nc(N3CCOCC3)nc(N3CCOCC3C)n2)cc1
Pa	Pi	Activity
0,822	0,004	Prostate cancer treatment						Pa	Pi	Predicted toxicity
0,725	0,002	mTOR inhibitor						0,489	0,106	Hyperglycemic
0,718	0,002	Phosphatidylinositol kinase inhibitor						0,363	0,065	Thrombocytopoiesis inhibitor
0,706	0,002	Phosphatidylinositol 3-kinase inhibitor						0,309	0,147	Anemia
0,660	0,002	Phosphatidylinositol 3-kinase alpha inhibitor
0,590	0,047	Antineoplastic
0,472	0,034	HMGCS2 expression enhancer
0,447	0,094	General pump inhibitor
0,403	0,063	Heat shock protein 27 antagonist
0,357	0,026	Imidazoline I1 receptor agonist
0,331	0,011	p21-activated kinase inhibitor
0,387	0,089	Vasodilator, peripheral
0,272	0,010	p21-activated kinase 4 inhibitor
0,305	0,052	Rheumatoid arthritis treatment
0,257	0,029	Interleukin agonist
0,299	0,072	Immunomodulator
0,311	0,093	Autoimmune disorders treatment
0,288	0,071	Hematopoietic inhibitor
0,329	0,119	Chemosensitizer
0,256	0,063	TRKB antagonist
0,196	0,003	Phosphatidylinositol 3-kinase gamma inhibitor
0,352	0,168	CYP2C8 inhibitor
0,187	0,004	Phosphatidylinositol 3-kinase stimulant
0,232	0,050	Chronic obstructive pulmonary disease treatment
0,211	0,035	Orexin receptor 1 antagonist
0,176	0,006	Phosphatidylinositol 3-kinase beta inhibitor
0,282	0,124	MAP3K5 inhibitor
0,232	0,087	Cyclic AMP modulator
0,229	0,090	CYP3A4 inhibitor
0,222	0,084	Antineoplastic (breast cancer)
0,320	0,185	Gastrin inhibitor
0,214	0,078	Antineoplastic enhancer
0,167	0,035	Restless leg syndrome treatment
0,138	0,010	CC chemokine 4 receptor antagonist
0,197	0,074	Transplant rejection treatment
0,129	0,007	Hematinic
0,143	0,026	Bacterial efflux pump inhibitor
0,135	0,019	Interleukin 12 agonist
0,272	0,161	P-glycoprotein substrate
0,260	0,158	Leukopoiesis inhibitor
0,224	0,123	Inflammatory Bowel disease treatment
0,124	0,026	TRKA antagonist
0,134	0,040	Proto-oncogene tyrosine-protein kinase Kit inhibitor
0,230	0,142	Raynaud's phenomenon treatment
0,095	0,009	Phosphatidylinositol 3-kinase delta inhibitor
0,137	0,052	Orexin receptor antagonist
0,115	0,032	Tyrosine-protein kinase receptor antagonist
0,114	0,035	Pyruvate dehydrogenase kinase inhibitor
0,159	0,087	Antimycoplasmal
0,336	0,264	CDP-glycerol glycerophosphotransferase inhibitor
0,094	0,022	Adenosine A2a receptor antagonist
0,119	0,048	Interleukin 2 antagonist
0,202	0,132	Proto-oncogene tyrosine-protein kinase Fgr inhibitor
0,138	0,071	Cytokine production inhibitor
0,151	0,087	MAP kinase 1 inhibitor
0,161	0,101	Janus tyrosine kinase 2 inhibitor
0,195	0,137	Cyclic GMP phosphodiesterase inhibitor
0,091	0,034	Retinopathy treatment
0,082	0,027	Adenosine A2 receptor antagonist
0,206	0,152	Antiparkinsonian
0,069	0,016	Vanilloid antagonist
0,071	0,020	Integrin alphaVbeta1 antagonist
0,135	0,085	Aurora-C kinase inhibitor
0,116	0,067	Fibroblast growth factor 2 antagonist
0,098	0,049	Janus tyrosine kinase 1 inhibitor
0,243	0,196	Insulysin inhibitor
0,167	0,120	Gastric antisecretory
0,110	0,069	Bruton tyrosine kinase inhibitor
0,054	0,014	Bulimia treatment
0,078	0,038	Adenosine receptor antagonist
0,204	0,167	Farnesoid X receptor antagonist
0,157	0,121	Signal transduction pathways inhibitor
0,133	0,099	Restenosis treatment
0,197	0,163	DNA synthesis inhibitor
0,121	0,088	Ca2+/calmodulin-dependent kinase I inhibitor
0,150	0,118	Sodium channel blocker
0,100	0,071	Fibroblast growth factor 3 antagonist
0,179	0,151	Angiogenesis inhibitor
0,057	0,033	Protein kinase B beta inhibitor
0,326	0,302	Nootropic
0,172	0,149	Antidiarrheal
0,151	0,134	RET inhibitor
0,031	0,015	Inosine monophosphate dehydrogenase inhibitor
0,108	0,093	Sleep disorders treatment
0,087	0,073	Topoisomerase II inhibitor
0,318	0,305	Phobic disorders treatment
0,095	0,084	Antifungal enhancer
0,021	0,010	Neutropenia treatment
0,023	0,013	DNA topoisomerase IV inhibitor
0,077	0,067	Protein kinase B inhibitor
0,093	0,083	Ephrin antagonist
0,110	0,102	Neuropeptide Y1 antagonist
0,085	0,076	Neuropeptide Y antagonist
0,192	0,183	Antineoplastic (bone cancer)
0,190	0,183	Antiasthmatic
0,066	0,060	Autotaxin inhibitor
0,039	0,032	Cardiac myosin stimulant
0,073	0,067	Fibroblast growth factor antagonist
0,247	0,242	Platelet derived growth factor receptor kinase inhibitor
0,163	0,158	Protein-tyrosine kinase p55(blk) inhibitor
0,039	0,034	Acetyl-CoA transferase inhibitor
0,075	0,070	Protein kinase B stimulant
0,009	0,007	Inosine monophosphate dehydrogenase 2 inhibitor
0,041	0,039	Glutamate (mGluR4) antagonist
0,069	0,067	Fibroblast growth factor 1 antagonist
0,006	0,004	Granulocyte stimulating factor agonist
0,034	0,033	ATM kinase inhibitor
0,056	0,056	Raf kinase C inhibitor

## Sheet: MTOR_46
		SMILES
		CCNC(=O)Nc1ccc(-c2nc3c(c(N4CCOCC4C)n2)CCOC3)cc1
Pa	Pi	Activity					Pa	Pi	Predicted toxicity
0,631	0,005	Prostate cancer treatment					0,230	0,071	Hypoglycemic
0,494	0,003	mTOR inhibitor					0,372	0,245	Twitching
0,530	0,052	Gastrin inhibitor
0,456	0,034	Antiasthmatic
0,447	0,067	Antineoplastic (non-Hodgkin's lymphoma)
0,371	0,003	Phosphatidylinositol kinase inhibitor
0,358	0,003	Phosphatidylinositol 3-kinase inhibitor
0,363	0,031	Rheumatoid arthritis treatment
0,380	0,086	Heat shock protein 27 antagonist
0,279	0,003	Phosphatidylinositol 3-kinase alpha inhibitor
0,346	0,080	CDK9/cyclin T1 inhibitor
0,312	0,049	DNA synthesis inhibitor
0,355	0,096	Neurodegenerative diseases treatment
0,296	0,043	Imidazoline I1 receptor agonist
0,323	0,086	Autoimmune disorders treatment
0,280	0,048	Systemic lupus erythematosus treatment
0,264	0,034	Male reproductive disfunction treatment
0,309	0,095	Analgesic, non-opioid
0,336	0,132	Antiinflammatory
0,254	0,062	CYP3A4 inhibitor
0,229	0,040	Catenin beta inhibitor
0,191	0,004	Phosphatidylinositol 3-kinase stimulant
0,175	0,012	Female sexual dysfunction treatment
0,181	0,020	Restless leg syndrome treatment
0,253	0,093	Alzheimer's disease treatment
0,290	0,135	Analgesic
0,162	0,008	Sulfonylureas
0,169	0,014	Insulin secretagoues
0,148	0,010	MAP kinase kinase 7 inhibitor
0,162	0,030	Topoisomerase II inhibitor
0,287	0,161	Antineoplastic
0,168	0,051	Sleep disorders treatment
0,124	0,024	Pyruvate dehydrogenase kinase inhibitor
0,257	0,165	Antiarthritic
0,114	0,024	Sodium/hydrogen exchanger 5 inhibitor
0,220	0,134	Immunomodulator
0,191	0,107	Antidiarrheal
0,095	0,014	Protein-tyrosine phosphatase 2C inhibitor
0,177	0,097	Sodium channel blocker
0,189	0,109	Antineoplastic enhancer
0,123	0,045	Proto-oncogene tyrosine-protein kinase Kit inhibitor
0,127	0,053	Fibroblast growth factor 2 antagonist
0,199	0,126	Antiobesity
0,077	0,005	Phosphatidylinositol 3-kinase gamma inhibitor
0,203	0,131	Proto-oncogene tyrosine-protein kinase Fgr inhibitor
0,104	0,032	Chemokine receptor antagonist
0,176	0,106	RET inhibitor
0,125	0,056	Vasculitis treatment
0,093	0,024	CC chemokine receptor antagonist
0,099	0,031	Protein kinase B inhibitor
0,111	0,051	Fibroblast growth factor 3 antagonist
0,074	0,015	Integrin alphaVbeta1 antagonist
0,131	0,076	Heart failure treatment
0,133	0,079	Calcium channel N-type blocker
0,115	0,062	Hyperprolactinemia treatment
0,206	0,153	Antiparkinsonian
0,125	0,076	Bacterial efflux pump inhibitor
0,108	0,061	Hedgehog signaling inhibitor
0,078	0,033	Ca(v)2.2 blocker
0,054	0,012	Acetyl-CoA transferase inhibitor
0,124	0,083	Cytokine production inhibitor
0,058	0,017	Cytokine production stimulant
0,133	0,094	Irritable Bowel syndrome treatment
0,192	0,160	Ophthalmic drug
0,052	0,020	Phosphatidylinositol 3-kinase beta inhibitor
0,145	0,113	Interleukin agonist
0,092	0,061	Interleukin 12 agonist
0,194	0,165	Adenosine regulator
0,059	0,031	Phosphatidylinositol 3-kinase delta inhibitor
0,081	0,054	Fibroblast growth factor antagonist
0,078	0,052	Fibroblast growth factor 1 antagonist
0,031	0,005	DNA topoisomerase IV inhibitor
0,233	0,211	HMGCS2 expression enhancer
0,248	0,227	Insulin promoter
0,187	0,166	Cyclic GMP phosphodiesterase inhibitor
0,212	0,193	Raynaud's phenomenon treatment
0,025	0,006	Antibiotic Naphthyridine-like
0,088	0,070	Neuropeptide Y antagonist
0,032	0,016	DNA gyrase inhibitor
0,070	0,055	Platelet activating factor beta antagonist
0,034	0,023	Purinergic P2Y12 antagonist
0,246	0,239	Chemosensitizer
0,023	0,018	Antibiotic Quinolone-like
0,162	0,159	Protein-tyrosine kinase p55(blk) inhibitor
0,023	0,021	Acetyl-CoA transferase 1 inhibitor
0,040	0,040	Spermine antagonist

## Sheet: MTOR_54
		SMILES
		CCNC(=O)Nc1ccc(-c2nc(N3CCOCC3)c3nnn(CC)c3n2)cc1
Pa	Pi	Activity					Pa	Pi	Predicted toxicity
0,811	0,004	Prostate cancer treatment					0,305	0,279	Twitching
0,795	0,002	mTOR inhibitor
0,669	0,002	Phosphatidylinositol kinase inhibitor
0,657	0,002	Phosphatidylinositol 3-kinase inhibitor
0,629	0,002	Phosphatidylinositol 3-kinase gamma inhibitor
0,493	0,016	CDK9/cyclin T1 inhibitor
0,439	0,026	Antineoplastic (breast cancer)
0,470	0,081	Antineoplastic
0,402	0,021	Biliary tract disorders treatment
0,425	0,046	Heat shock protein 27 antagonist
0,433	0,107	Gastrin inhibitor
0,326	0,006	Adenosine receptor antagonist
0,325	0,053	Antiparkinsonian
0,380	0,148	Proteasome ATPase inhibitor
0,325	0,105	Anticonvulsant
0,216	0,003	Phosphatidylinositol 3-kinase alpha inhibitor
0,218	0,010	Adenosine A2a receptor antagonist
0,262	0,060	Imidazoline I1 receptor agonist
0,259	0,064	Adenosine regulator
0,295	0,107	MAP3K5 inhibitor
0,308	0,126	Nucleotide metabolism regulator
0,191	0,010	Adenosine A1 receptor antagonist
0,234	0,056	Cyclic GMP phosphodiesterase inhibitor
0,307	0,129	Neurodegenerative diseases treatment
0,186	0,010	Adenosine A2 receptor antagonist
0,247	0,086	DNA synthesis inhibitor
0,215	0,059	Chronic obstructive pulmonary disease treatment
0,161	0,007	Phosphatidylinositol 3-kinase beta inhibitor
0,284	0,130	HMGCS2 expression enhancer
0,197	0,045	Dual specificity phosphatase inhibitor
0,164	0,023	Fibroblast growth factor 2 antagonist
0,239	0,104	Angiogenesis inhibitor
0,197	0,062	Interleukin agonist
0,137	0,013	Adenosine A3 receptor antagonist
0,142	0,018	Fibroblast growth factor 3 antagonist
0,219	0,096	Channel-conductance-controlling ATPase inhibitor
0,247	0,133	H+-transporting two-sector ATPase inhibitor
0,217	0,103	Antieczematic atopic
0,165	0,056	Renal disease treatment
0,112	0,008	Gastric emptying disorders treatment
0,110	0,008	Lipase inhibitor
0,235	0,135	Antiasthmatic
0,190	0,092	RET inhibitor
0,183	0,085	Growth factor agonist
0,093	0,010	Phosphatidylinositol 3-kinase delta inhibitor
0,129	0,046	Ephrin antagonist
0,204	0,122	Antineoplastic (brain cancer)
0,237	0,158	Cyclic AMP phosphodiesterase inhibitor
0,205	0,127	Proto-oncogene tyrosine-protein kinase Fgr inhibitor
0,157	0,081	Antineoplastic (glioma)
0,113	0,039	Neuropeptide Y antagonist
0,255	0,181	Insulysin inhibitor
0,102	0,028	Fibroblast growth factor 1 antagonist
0,129	0,060	Neuropeptide Y1 antagonist
0,225	0,158	Antiallergic
0,101	0,036	Fibroblast growth factor antagonist
0,144	0,078	Aurora-C kinase inhibitor
0,113	0,050	Constipation treatment
0,098	0,034	Aurora-A kinase inhibitor
0,112	0,053	Topoisomerase II inhibitor
0,117	0,060	Phosphatidylinositol 3-kinase stimulant
0,080	0,024	Purinergic P2T antagonist
0,103	0,047	Neuropeptide antagonist
0,071	0,019	Integrin alphaVbeta1 antagonist
0,189	0,140	Rheumatoid arthritis treatment
0,091	0,045	Vascular endothelial growth factor 1 antagonist
0,115	0,071	Vasculitis treatment
0,081	0,038	Sulfonylureas
0,097	0,054	Interleukin 12 agonist
0,074	0,032	Potassium channel (Ca-activated) blocker
0,099	0,060	Stem cell growth factor agonist
0,121	0,086	Cytokine production inhibitor
0,108	0,073	Interleukin 2 antagonist
0,111	0,078	Gastrointestinal disorders treatment
0,183	0,151	Platelet aggregation inhibitor
0,082	0,053	Hepatocyte growth factor antagonist
0,081	0,053	Aurora kinase inhibitor
0,038	0,011	Purinergic P2Y12 antagonist
0,046	0,020	Acetyl-CoA transferase inhibitor
0,077	0,050	Platelet activating factor beta antagonist
0,084	0,059	Gastroesophageal reflux disease treatment
0,156	0,131	TRKB antagonist
0,052	0,028	Epoxide hydrolase inhibitor
0,195	0,172	Antineoplastic (bone cancer)
0,029	0,006	DNA topoisomerase IV inhibitor
0,069	0,047	Purinergic receptor antagonist
0,117	0,098	Heart failure treatment
0,065	0,046	Platelet activating factor alpha antagonist
0,043	0,027	Purinergic P2Y antagonist
0,034	0,019	Beta lactamase Imi-1 inhibitor
0,036	0,022	Bulimia treatment
0,128	0,117	Restless leg syndrome treatment
0,026	0,015	Acetyl-CoA transferase 1 inhibitor
0,060	0,050	Purinergic P2 antagonist
0,064	0,058	Raf kinase inhibitor
0,097	0,092	Bruton tyrosine kinase inhibitor
0,042	0,038	Spermine antagonist
0,034	0,031	Lactamase A inhibitor
0,082	0,079	Vascular endothelial growth factor 3 antagonist
0,016	0,014	Epoxide hydrolase 2 inhibitor
0,062	0,062	Protein kinase (Mos, Mil/Raf, MEKK, RIPK, TESK, LIMK, IRAK, ILK, Activin/TGF-beta) inhibitor

[truncated: 20 more sheets: MTOR_60, MTOR_62, MTOR_67, MTOR_70, MTOR_71, MTOR_84, MTOR_85, MTOR_87, MTOR_88, MTOR_126, MTOR_140, MTOR_155, MTOR_175, MTOR_258, MTOR_338, MTOR_343, MTOR_430, MTOR_472, MTOR_757, all hits]
