# Supplementary material for: AI-Predicted mTOR Inhibitor Reduces Cancer Cell Proliferation and Extends the Lifespan of C. elegans
Source: Int J Mol Sci. 2023 Apr 25;24(9):7850. doi: 10.3390/ijms24097850 (PMC10177929; doi:10.3390/ijms24097850)
Supplement: Supplementary file 1 [file ijms-24-07850-s001.zip › Supplementary_Table_S2_lifespanTKA001.xlsx]

## Sheet: Fig3D_lifespanData
Days of adulthood	cont (+DMSO)	100uM TKA001	200 uM TKA001
8	1					Statistics
9	1					Censored worms: Fig3D: cont = 0, TKA001 (100µM) = 2, TKA001 (200µM) = 0;
10	1
12	1					Control vs 100 uM TKA001
12	1					Log-rank (Mantel-Cox) test
13	1					Chi square	8.985
13	1					df	1
14	1					P value	0.0027
14	1					P value summary	**
14	1					Are the survival curves sig different?	Yes
14	1
14	1					Control vs 200 uM TKA001
14	1					Log-rank (Mantel-Cox) test
14	1					Chi square	4.684
15	1					df	1
15	1					P value	0.0304
15	1					P value summary	*
15	1					Are the survival curves sig different?	Yes
15	1
15	1
15	1
16	1
16	1
16	1
16	1
16	1
16	1
17	1
17	1
17	1
17	1
17	1
17	1
17	1
18	1
18	1
18	1
18	1
18	1
18	1
19	1
19	1
19	1
20	1
20	1
21	1
21	1
21	1
21	1
21	1
22	1
22	1
22	1
22	1
22	1
22	1
22	1
23	1
23	1
23	1
23	1
23	1
24	1
24	1
24	1
24	1
24	1
25	1
25	1
25	1
25	1
25	1
26	1
26	1
26	1
27	1
27	1
27	1
28	1
28	1
28	1
29	1
29	1
29	1
29	1
29	1
29	1
29	1
30	1
30	1
30	1
30	1
30	1
30	1
30	1
30	1
30	1
31	1
31	1
31	1
31	1
31	1
31	1
31	1
31	1
32	1
32	1
32	1
32	1
32	1
32	1
32	1
33	1
33	1
34	1
34	1
35	1
35	1
35	1
35	1
36	1
36	1
36	1
37	1
37	1
37	1
37	1
38	1
9		0
10		0
11		1
11		1
11		1
11		1
12		1
13		1
13		1
13		1
14		1
14		1
15		1
15		1
15		1
15		1
16		1
16		1
16		1
17		1
17		1
17		1
17		1
17		1
18		1
18		1
18		1
18		1
19		1
19		1
19		1
19		1
19		1
19		1
19		1
19		1
19		1
20		1
20		1
20		1
20		1
20		1
20		1
21		1
21		1
21		1
21		1
21		1
21		1
21		1
21		1
22		1
22		1
22		1
22		1
22		1
22		1
22		1
23		1
23		1
23		1
23		1
24		1
24		1
24		1
24		1
25		1
25		1
25		1
25		1
26		1
28		1
28		1
28		1
29		1
29		1
29		1
29		1
29		1
30		1
30		1
30		1
30		1
30		1
31		1
31		1
31		1
31		1
31		1
31		1
31		1
32		1
32		1
32		1
32		1
32		1
32		1
33		1
33		1
33		1
33		1
33		1
33		1
33		1
34		1
34		1
34		1
34		1
34		1
34		1
35		1
35		1
35		1
35		1
35		1
36		1
36		1
37		1
37		1
37		1
37		1
38		1
38		1
38		1
38		1
38		1
40		1
40		1
41		1
42		1
42		1
42		1
43		1
43		1
9			1
10			1
10			1
12			1
12			1
12			1
13			1
14			1
14			1
14			1
14			1
14			1
15			1
15			1
15			1
15			1
15			1
15			1
16			1
16			1
16			1
16			1
16			1
16			1
17			1
17			1
17			1
17			1
17			1
17			1
17			1
18			1
18			1
18			1
18			1
18			1
19			1
19			1
19			1
19			1
19			1
19			1
19			1
19			1
20			1
20			1
20			1
20			1
20			1
20			1
20			1
20			1
21			1
21			1
21			1
21			1
21			1
21			1
21			1
21			1
22			1
22			1
22			1
22			1
22			1
22			1
22			1
23			1
23			1
23			1
23			1
23			1
23			1
24			1
24			1
24			1
25			1
25			1
25			1
26			1
27			1
27			1
27			1
28			1
28			1
28			1
29			1
29			1
29			1
29			1
30			1
30			1
30			1
31			1
31			1
31			1
31			1
31			1
31			1
32			1
32			1
32			1
32			1
32			1
32			1
33			1
33			1
33			1
33			1
33			1
34			1
34			1
34			1
34			1
34			1
34			1
34			1
35			1
35			1
35			1
36			1
37			1
37			1
37			1
37			1
38			1
38			1
38			1
38			1
39			1
39			1
40			1
40			1
41			1
41			1
42			1
44			1
46			1
47			1

## Sheet: Fig3E_lifespanData
Days of adulthood	cont (+DMSO)	TKA001 (10 μM)
12	1
13	1		Comparison of Survival Curves
17	1
17	1		Log-rank (Mantel-Cox) test
17	1		Chi square	7.087
18	1		df	1
18	0		P value	0.0078
19	1		P value summary	**
19	1		Are the survival curves sig different?	Yes
20	1
21	1
21	1
21	1
22	1
22	1
22	1
22	1
23	1
23	1
23	1
24	1
24	1
24	1
25	1
25	1
26	1
26	1
26	1
27	1
27	1
27	1
28	1
28	1
28	1
28	1
28	1
28	1
28	1
29	1
29	1
29	1
29	1
29	1
29	1
29	1
29	1
29	1
29	1
30	1
30	1
30	1
30	1
30	1
30	1
30	1
30	1
30	1
30	1
31	1
31	1
31	1
31	1
31	1
31	1
31	1
31	1
31	1
31	1
32	1
32	1
32	1
32	1
32	1
32	1
32	1
32	1
32	1
32	1
32	1
33	1
33	1
33	1
33	1
33	1
33	1
33	1
33	1
33	1
34	1
34	1
34	1
34	1
34	1
34	1
34	1
34	1
34	1
35	1
35	1
35	1
35	1
35	1
35	1
35	1
35	1
35	1
36	1
36	1
36	1
36	1
36	1
36	1
36	1
36	1
37	1
37	1
37	1
37	1
37	1
37	1
37	1
38	1
38	1
38	1
38	1
38	1
39	1
39	1
39	1
39	1
40	1
40	1
40	1
41	1
42	1
43	1
46	1
48	1
14		1
17		1
17		1
17		1
18		1
19		1
19		1
21		1
22		1
23		1
23		1
23		1
24		1
24		1
25		1
26		1
26		1
26		1
27		1
27		1
28		1
28		1
28		1
28		1
28		1
28		1
28		1
29		1
29		1
29		1
29		1
29		1
29		1
29		1
29		1
30		1
30		1
30		1
30		1
30		1
30		1
30		1
30		1
30		1
30		1
31		1
31		1
31		1
31		1
31		1
31		1
31		1
31		1
31		1
32		1
32		1
32		1
32		1
32		1
32		1
32		1
32		1
32		1
32		1
33		1
33		1
33		1
33		1
33		1
33		1
33		1
33		1
33		1
34		1
34		1
34		1
34		1
34		1
34		1
34		1
35		1
35		1
35		1
35		1
35		1
35		1
35		1
35		1
36		1
36		1
36		1
36		1
36		1
36		1
37		1
37		1
37		1
37		1
37		1
37		1
37		1
38		1
38		1
38		1
38		1
38		1
38		1
39		1
39		1
39		1
39		1
39		1
39		1
40		1
40		1
40		1
40		1
41		1
41		1
42		1
43		1
44		1
45		1
46		1
48		1
48		1
48		1
48		1
49		1
49		1
52		1

## Sheet: FigS3_statisticsLifespan
Product-Limit Survival Fit
Survival Plot
Time to event:	Age at Death (d)
Censored by	Censored
Censor Code	1
Grouped by	Condition 1
Frequency counts from	Event Frequency
Summary
Group	Number failed	Number censored	Mean	Std Error
Cont	58	0	32.5888	1.06098
Rapamycin (100uM)	70	9	35.4829	0.62954
TKA001 (10uM)	74	10	37.3076	0.68045
TKA001 (100uM)	64	0	37.1975	0.69583
Combined	266	19	35.8336	0.38987
Quantiles
Group	Median Time	Lower 95%	Upper 95%	25% Failures	75% Failures
Cont	33.759	31.259	35.759	27.176	38.759
Rapamycin (100uM)	35.888	33.722	37.972	31.138	39.222
TK001 (10uM)	39.326	37.159	39.992	34.201	41.826
TK001 (100uM)	38.451	37.034	39.951	34.242	41.409
Combined	37.201	35.909	37.972	31.576	40.784
Tests Between Groups
Test	ChiSquare	DF	Prob>ChiSq
Log-Rank	8.9585	3	0.0298
Wilcoxon	21.374	3	<.0001
Control
Age at Death (d)	Survival	Failure	SurvStdErr	Number failed	Number censored	At Risk
0	1	0	0	0	0	58
14.5508	0.9828	0.0172	0.0171	1	0	58
15.9258	0.9655	0.0345	0.024	1	0	57
19.0091	0.9483	0.0517	0.0291	1	0	56
19.4258	0.931	0.069	0.0333	1	0	55
19.6758	0.9138	0.0862	0.0369	1	0	54
20.1758	0.8966	0.1034	0.04	1	0	53
20.8424	0.8793	0.1207	0.0428	1	0	52
20.9258	0.8448	0.1552	0.0475	2	0	51
21.0924	0.8276	0.1724	0.0496	1	0	49
22.4258	0.8103	0.1897	0.0515	1	0	48
23.6758	0.7931	0.2069	0.0532	1	0	47
26.4258	0.7759	0.2241	0.0548	1	0	46
26.8424	0.7586	0.2414	0.0562	1	0	45
27.1758	0.7414	0.2586	0.0575	1	0	44
28.5091	0.7241	0.2759	0.0587	1	0	43
29.5091	0.7069	0.2931	0.0598	1	0	42
30.2591	0.6897	0.3103	0.0607	1	0	41
30.3424	0.6552	0.3448	0.0624	2	0	40
31.0091	0.6379	0.3621	0.0631	1	0	38
31.2591	0.6207	0.3793	0.0637	1	0	37
31.4258	0.6034	0.3966	0.0642	1	0	36
31.9258	0.5862	0.4138	0.0647	1	0	35
32.5924	0.569	0.431	0.065	1	0	34
32.9258	0.5345	0.4655	0.0655	2	0	33
33.5091	0.5172	0.4828	0.0656	1	0	31
33.5924	0.5	0.5	0.0657	1	0	30
33.9258	0.4828	0.5172	0.0656	1	0	29
34.0091	0.4655	0.5345	0.0655	1	0	28
34.7591	0.4483	0.5517	0.0653	1	0	27
34.9258	0.431	0.569	0.065	1	0	26
35.0924	0.3966	0.6034	0.0642	2	0	25
35.1758	0.3793	0.6207	0.0637	1	0	23
35.7591	0.3621	0.6379	0.0631	1	0	22
36.2591	0.3448	0.6552	0.0624	1	0	21
36.4258	0.3276	0.6724	0.0616	1	0	20
36.5924	0.2931	0.7069	0.0598	2	0	19
37.7591	0.2759	0.7241	0.0587	1	0	17
38.5091	0.2586	0.7414	0.0575	1	0	16
38.7591	0.2414	0.7586	0.0562	1	0	15
39.0924	0.2241	0.7759	0.0548	1	0	14
39.3424	0.2069	0.7931	0.0532	1	0	13
39.9258	0.1897	0.8103	0.0515	1	0	12
40.7591	0.1724	0.8276	0.0496	1	0	11
40.8424	0.1552	0.8448	0.0475	1	0	10
41.2591	0.1379	0.8621	0.0453	1	0	9
41.7591	0.1207	0.8793	0.0428	1	0	8
42.3424	0.1034	0.8966	0.04	1	0	7
42.6758	0.0862	0.9138	0.0369	1	0	6
44.3424	0.069	0.931	0.0333	1	0	5
44.4258	0.0517	0.9483	0.0291	1	0	4
44.5924	0.0345	0.9655	0.024	1	0	3
44.8424	0.0172	0.9828	0.0171	1	0	2
45.0924	0	1	0	1	0	1
Rapamycin (100uM)
Age at Death (d)	Survival	Failure	SurvStdErr	Number failed	Number censored	At Risk
0	1	0	0	0	0	79
19.1383	0.9873	0.0127	0.0126	1	0	79
22.5549	0.9747	0.0253	0.0177	1	0	78
23.6383	0.962	0.038	0.0215	1	0	77
27.2216	0.9494	0.0506	0.0247	1	0	76
27.5549	0.9367	0.0633	0.0274	1	0	75
27.9716	0.9241	0.0759	0.0298	1	0	74
28.9716	0.8861	0.1139	0.0357	3	0	73
29.0549	0.8734	0.1266	0.0374	1	0	70
29.3049	0.8481	0.1519	0.0404	2	0	69
29.8049	0.8354	0.1646	0.0417	1	0	67
29.8883	0.8228	0.1772	0.043	1	0	66
30.2216	0.8101	0.1899	0.0441	1	0	65
30.3049	0.7848	0.2152	0.0462	2	0	64
30.8883	0.7722	0.2278	0.0472	1	0	62
31.0549	0.7595	0.2405	0.0481	1	0	61
31.1383	0.7342	0.2658	0.0497	2	0	60
31.5549	0.7215	0.2785	0.0504	1	0	58
31.7216	0.7089	0.2911	0.0511	1	0	57
31.8883	0.6962	0.3038	0.0517	1	0	56
32.1383	0.6835	0.3165	0.0523	1	0	55
32.5549	0.6582	0.3418	0.0534	2	0	54
33.3883	0.6456	0.3544	0.0538	1	0	52
33.7216	0.6076	0.3924	0.0549	3	0	51
34.1383	0.5949	0.4051	0.0552	1	0	48
34.3049	0.5823	0.4177	0.0555	1	0	47
34.7216	0.5696	0.4304	0.0557	1	0	46
34.8883	0.557	0.443	0.0559	1	0	45
35.0549	0.5316	0.4684	0.0561	2	0	44
35.2216	0.519	0.481	0.0562	1	0	42
35.7216	0.5063	0.4937	0.0562	1	0	41
35.8049	0.5063	0.4937	0.0562	0	9	40
35.8883	0.49	0.51	0.0568	1	0	31
36.3049	0.4737	0.5263	0.0572	1	0	30
36.6383	0.4573	0.5427	0.0575	1	0	29
37.5549	0.441	0.559	0.0577	1	0	28
37.6383	0.4247	0.5753	0.0578	1	0	27
37.8883	0.4083	0.5917	0.0579	1	0	26
37.9716	0.3757	0.6243	0.0577	2	0	25
38.3049	0.343	0.657	0.0571	2	0	23
38.6383	0.3267	0.6733	0.0567	1	0	21
38.8049	0.294	0.706	0.0555	2	0	20
39.0133	0.2777	0.7223	0.0548	1	0	18
39.2216	0.245	0.755	0.053	2	0	17
39.8049	0.2287	0.7713	0.0519	1	0	15
39.9716	0.2123	0.7877	0.0507	1	0	14
40.0549	0.196	0.804	0.0494	1	0	13
40.3883	0.1797	0.8203	0.0479	1	0	12
40.8883	0.1633	0.8367	0.0462	1	0	11
41.3049	0.147	0.853	0.0444	1	0	10
42.1383	0.1307	0.8693	0.0424	1	0	9
42.2216	0.1143	0.8857	0.0401	1	0	8
42.3049	0.098	0.902	0.0375	1	0	7
42.8883	0.0817	0.9183	0.0347	1	0	6
43.3883	0.0653	0.9347	0.0313	1	0	5
43.4716	0.049	0.951	0.0274	1	0	4
43.7216	0.0327	0.9673	0.0226	1	0	3
43.8883	0.0163	0.9837	0.0162	1	0	2
45.1383	0	1	0	1	0	1
TKA001 (10uM)
Age at Death (d)	Survival	Failure	SurvStdErr	Number failed	Number censored	At Risk
0	1	0	0	0	0	84
17.4924	0.9881	0.0119	0.0118	1	0	84
20.7424	0.9762	0.0238	0.0166	1	0	83
20.9924	0.9643	0.0357	0.0202	1	0	82
21.1591	0.9524	0.0476	0.0232	1	0	81
23.3258	0.9405	0.0595	0.0258	1	0	80
24.0758	0.9286	0.0714	0.0281	1	0	79
25.3258	0.9167	0.0833	0.0302	1	0	78
29.8258	0.9048	0.0952	0.032	1	0	77
29.9091	0.8929	0.1071	0.0337	1	0	76
29.9924	0.881	0.119	0.0353	1	0	75
30.7424	0.869	0.131	0.0368	1	0	74
31.1591	0.8571	0.1429	0.0382	1	0	73
31.2424	0.8452	0.1548	0.0395	1	0	72
31.4091	0.8333	0.1667	0.0407	1	0	71
31.5758	0.8214	0.1786	0.0418	1	0	70
31.8258	0.8095	0.1905	0.0428	1	0	69
32.3258	0.7976	0.2024	0.0438	1	0	68
32.9924	0.7857	0.2143	0.0448	1	0	67
33.6591	0.7738	0.2262	0.0456	1	0	66
34.0758	0.7619	0.2381	0.0465	1	0	65
34.1591	0.75	0.25	0.0472	1	0	64
34.2424	0.7381	0.2619	0.048	1	0	63
35.1591	0.7262	0.2738	0.0487	1	0	62
35.3258	0.7143	0.2857	0.0493	1	0	61
35.5758	0.7024	0.2976	0.0499	1	0	60
35.6591	0.6905	0.3095	0.0504	1	0	59
35.9091	0.6786	0.3214	0.051	1	0	58
36.0758	0.6667	0.3333	0.0514	1	0	57
36.8258	0.6429	0.3571	0.0523	2	0	56
36.9091	0.631	0.369	0.0527	1	0	54
37.0758	0.619	0.381	0.053	1	0	53
37.1591	0.6071	0.3929	0.0533	1	0	52
37.2424	0.5952	0.4048	0.0536	1	0	51
37.5758	0.5833	0.4167	0.0538	1	0	50
37.6591	0.5714	0.4286	0.054	1	0	49
37.7424	0.5595	0.4405	0.0542	1	0	48
38.0758	0.5476	0.4524	0.0543	1	0	47
38.5758	0.5357	0.4643	0.0544	1	0	46
38.9924	0.5238	0.4762	0.0545	1	0	45
39.1591	0.5119	0.4881	0.0545	1	0	44
39.3258	0.4762	0.5238	0.0545	3	0	43
39.6591	0.4524	0.5476	0.0543	2	0	40
39.7424	0.4167	0.5833	0.0538	3	0	38
39.8258	0.4048	0.5952	0.0536	1	0	35
39.9924	0.3929	0.6071	0.0533	1	0	34
40.0758	0.381	0.619	0.053	1	0	33
40.3258	0.369	0.631	0.0527	1	10	32
40.6591	0.3515	0.6485	0.053	1	0	21
40.7424	0.3339	0.6661	0.0532	1	0	20
41.2424	0.3163	0.6837	0.0532	1	0	19
41.4924	0.2988	0.7012	0.0531	1	0	18
41.5758	0.2812	0.7188	0.0528	1	0	17
41.8258	0.246	0.754	0.0517	2	0	16
41.9091	0.2109	0.7891	0.0499	2	0	14
42.0758	0.1933	0.8067	0.0488	1	0	12
42.1591	0.1757	0.8243	0.0474	1	0	11
42.4091	0.1582	0.8418	0.0458	1	0	10
43.0758	0.1406	0.8594	0.044	1	0	9
43.3258	0.123	0.877	0.0418	1	0	8
43.5758	0.0703	0.9297	0.0332	3	0	7
43.6591	0.0527	0.9473	0.0292	1	0	4
44.3258	0.0351	0.9649	0.0242	1	0	3
45.0758	0	1	0	2	0	2
TKA001 (100uM)
Age at Death (d)	Survival	Failure	SurvStdErr	Number failed	Number censored	At Risk
0	1	0	0	0	0	64
23.1174	0.9844	0.0156	0.0155	1	0	64
24.3674	0.9688	0.0313	0.0217	1	0	63
25.5341	0.9531	0.0469	0.0264	1	0	62
26.7008	0.9375	0.0625	0.0303	1	0	61
26.8674	0.9219	0.0781	0.0335	1	0	60
27.5341	0.9063	0.0938	0.0364	1	0	59
28.7008	0.8906	0.1094	0.039	1	0	58
28.7841	0.875	0.125	0.0413	1	0	57
28.8674	0.8594	0.1406	0.0435	1	0	56
30.6174	0.8438	0.1563	0.0454	1	0	55
31.0341	0.8281	0.1719	0.0472	1	0	54
31.4508	0.8125	0.1875	0.0488	1	0	53
31.8674	0.7969	0.2031	0.0503	1	0	52
32.2008	0.7813	0.2188	0.0517	1	0	51
33.7841	0.7656	0.2344	0.053	1	0	50
34.0341	0.75	0.25	0.0541	1	0	49
34.4508	0.7344	0.2656	0.0552	1	0	48
35.1174	0.7188	0.2813	0.0562	1	0	47
35.2008	0.7031	0.2969	0.0571	1	0	46
35.2841	0.6719	0.3281	0.0587	2	0	45
35.5758	0.6563	0.3438	0.0594	1	0	43
36.8674	0.6406	0.3594	0.06	1	0	42
37.0341	0.625	0.375	0.0605	1	0	41
37.1174	0.6094	0.3906	0.061	1	0	40
37.2008	0.5938	0.4063	0.0614	1	0	39
37.2841	0.5781	0.4219	0.0617	1	0	38
37.5341	0.5625	0.4375	0.062	1	0	37
37.6174	0.5469	0.4531	0.0622	1	0	36
37.7841	0.5313	0.4688	0.0624	1	0	35
37.9508	0.5156	0.4844	0.0625	1	0	34
38.2841	0.5	0.5	0.0625	1	0	33
38.6174	0.4844	0.5156	0.0625	1	0	32
38.7008	0.4688	0.5313	0.0624	1	0	31
39.0341	0.4375	0.5625	0.062	2	0	30
39.5341	0.4219	0.5781	0.0617	1	0	28
39.6174	0.4063	0.5938	0.0614	1	0	27
39.8674	0.3906	0.6094	0.061	1	0	26
39.9508	0.375	0.625	0.0605	1	0	25
40.2008	0.3594	0.6406	0.06	1	0	24
40.2841	0.3438	0.6563	0.0594	1	0	23
40.4508	0.3125	0.6875	0.0579	2	0	22
40.5341	0.2969	0.7031	0.0571	1	0	20
40.7841	0.2813	0.7188	0.0562	1	0	19
41.0341	0.25	0.75	0.0541	2	0	18
41.7841	0.2344	0.7656	0.053	1	0	16
41.9508	0.2188	0.7813	0.0517	1	0	15
42.0341	0.2031	0.7969	0.0503	1	0	14
42.1174	0.1875	0.8125	0.0488	1	0	13
42.3674	0.1563	0.8438	0.0454	2	0	12
42.5341	0.1406	0.8594	0.0435	1	0	10
43.3674	0.1094	0.8906	0.039	2	0	9
43.4508	0.0938	0.9063	0.0364	1	0	7
43.5341	0.0781	0.9219	0.0335	1	0	6
43.8674	0.0625	0.9375	0.0303	1	0	5
44.1174	0.0469	0.9531	0.0264	1	0	4
44.2008	0.0313	0.9688	0.0217	1	0	3
44.3674	0.0156	0.9844	0.0155	1	0	2
45.0341	0	1	0	1	0	1

## Sheet: FigS3_lifespanData
Experiment	Animal Description	Plate Position Name	Plate Row	Plate Column	Plate Center Position X (inches)	Plate Center Position Y (inches)	Plate Size X (inches)	Plate Size Y (inches)	Strain	Genotype	Condition 1	Condition 2	Condition 3	Culturing Temperature	Experiment Temperature	Food Source	Environmental Conditions	Incubator Name	Incubator Column	Incubator Shelf	Event Frequency	Age at Death (d)	Duration Not Fast Moving (d)	Longest Gap in Measurement (d)	Age at Death-Associated Posture Relaxation Start (d)	Age at Death-Associated Posture Relaxation End (d)	Censored	Censored Reason	Event Observation Type	Annotation Source	Technique	Analysis Type	Event Type	Special Flag
02032023_Alex	::TK001 (10uM)::20::OP50_HI::lifespan	c::0	0	c	4.98594	1.06094	1.97188	1.98438			TK001 (10uM)			20	18	OP50_HI	lifespan				1	20.7424	5.33333	0.0833333	20.7424	20.7424	0			Automated Analysis	Lifespan Machine
02032023_Alex	::TK001 (10uM)::20::OP50_HI::lifespan	c::0	0	c	4.98594	1.06094	1.97188	1.98438			TK001 (10uM)			20	18	OP50_HI	lifespan				1	33.6591	13.75	0.0833333	46.4091	46.4091	0			Automated Analysis	Lifespan Machine
02032023_Alex	::TK001 (10uM)::20::OP50_HI::lifespan	c::0	0	c	4.98594	1.06094	1.97188	1.98438			TK001 (10uM)			20	18	OP50_HI	lifespan				1	34.1591	9.66667	0.0833333	34.2424	34.2424	0			Automated Analysis	Lifespan Machine
02032023_Alex	::TK001 (10uM)::20::OP50_HI::lifespan	c::0	0	c	4.98594	1.06094	1.97188	1.98438			TK001 (10uM)			20	18	OP50_HI	lifespan				1	34.2424	4.25	0.0833333	46.4091	46.4091	0			Automated Analysis	Lifespan Machine
02032023_Alex	::TK001 (10uM)::20::OP50_HI::lifespan	c::0	0	c	4.98594	1.06094	1.97188	1.98438			TK001 (10uM)			20	18	OP50_HI	lifespan				1	35.6591	6.33333	0.0833333	46.4091	46.4091	0			Automated Analysis	Lifespan Machine
02032023_Alex	::TK001 (10uM)::20::OP50_HI::lifespan	c::0	0	c	4.98594	1.06094	1.97188	1.98438			TK001 (10uM)			20	18	OP50_HI	lifespan				1	36.8258	8.08333	0.0833333	46.4091	46.4091	0			Automated Analysis	Lifespan Machine
02032023_Alex	::TK001 (10uM)::20::OP50_HI::lifespan	c::0	0	c	4.98594	1.06094	1.97188	1.98438			TK001 (10uM)			20	18	OP50_HI	lifespan				1	37.1591	5.75	0.0833333	46.3258	46.3258	0			Automated Analysis	Lifespan Machine
02032023_Alex	::TK001 (10uM)::20::OP50_HI::lifespan	c::0	0	c	4.98594	1.06094	1.97188	1.98438			TK001 (10uM)			20	18	OP50_HI	lifespan				1	37.2424	10.5833	0.0833333	46.4091	46.4091	0			Automated Analysis	Lifespan Machine
02032023_Alex	::TK001 (10uM)::20::OP50_HI::lifespan	c::0	0	c	4.98594	1.06094	1.97188	1.98438			TK001 (10uM)			20	18	OP50_HI	lifespan				1	38.5758	5.16667	0.0833333	35.7424	44.6591	0			Automated Analysis	Lifespan Machine
02032023_Alex	::TK001 (10uM)::20::OP50_HI::lifespan	c::0	0	c	4.98594	1.06094	1.97188	1.98438			TK001 (10uM)			20	18	OP50_HI	lifespan				1	39.8258	18.5	0.0833333	39.8258	39.8258	0			Automated Analysis	Lifespan Machine
02032023_Alex	::TK001 (10uM)::20::OP50_HI::lifespan	c::0	0	c	4.98594	1.06094	1.97188	1.98438			TK001 (10uM)			20	18	OP50_HI	lifespan				1	39.9924	10.0833	0.0833333	39.4091	46.4091	0			Automated Analysis	Lifespan Machine
02032023_Alex	::TK001 (10uM)::20::OP50_HI::lifespan	c::0	0	c	4.98594	1.06094	1.97188	1.98438			TK001 (10uM)			20	18	OP50_HI	lifespan				1	40.0758	15.0833	0.0833333	46.4091	46.4091	0			Automated Analysis	Lifespan Machine
02032023_Alex	::TK001 (10uM)::20::OP50_HI::lifespan	c::0	0	c	4.98594	1.06094	1.97188	1.98438			TK001 (10uM)			20	18	OP50_HI	lifespan				1	40.6591	5.25	0.0833333	46.4091	46.4091	0			Automated Analysis	Lifespan Machine
02032023_Alex	::TK001 (10uM)::20::OP50_HI::lifespan	c::0	0	c	4.98594	1.06094	1.97188	1.98438			TK001 (10uM)			20	18	OP50_HI	lifespan				1	40.7424	15.4167	0.0833333	40.7424	40.7424	0			Automated Analysis	Lifespan Machine
02032023_Alex	::TK001 (10uM)::20::OP50_HI::lifespan	c::0	0	c	4.98594	1.06094	1.97188	1.98438			TK001 (10uM)			20	18	OP50_HI	lifespan				1	41.4924	7.91667	0.0833333	41.6591	41.6591	0			Automated Analysis	Lifespan Machine
02032023_Alex	::TK001 (10uM)::20::OP50_HI::lifespan	c::0	0	c	4.98594	1.06094	1.97188	1.98438			TK001 (10uM)			20	18	OP50_HI	lifespan				1	45.0758	7.75	0.0833333	44.0758	46.4091	0			Automated Analysis	Lifespan Machine
02032023_Alex	::TK001 (10uM)::20::OP50_HI::lifespan	c::1	1	c	5.01406	3.1875	1.97188	1.99375			TK001 (10uM)			20	18	OP50_HI	lifespan				1	24.0758	4.16667	0.0833333	46.4091	46.4091	0			Automated Analysis	Lifespan Machine
02032023_Alex	::TK001 (10uM)::20::OP50_HI::lifespan	c::1	1	c	5.01406	3.1875	1.97188	1.99375			TK001 (10uM)			20	18	OP50_HI	lifespan				1	29.9091	6.41667	0.0833333	46.4091	46.4091	0			Automated Analysis	Lifespan Machine
02032023_Alex	::TK001 (10uM)::20::OP50_HI::lifespan	c::1	1	c	5.01406	3.1875	1.97188	1.99375			TK001 (10uM)			20	18	OP50_HI	lifespan				1	31.4091	8.75	0.0833333	46.4091	46.4091	0			Automated Analysis	Lifespan Machine
02032023_Alex	::TK001 (10uM)::20::OP50_HI::lifespan	c::1	1	c	5.01406	3.1875	1.97188	1.99375			TK001 (10uM)			20	18	OP50_HI	lifespan				1	31.5758	2.91667	0.0833333	46.4091	46.4091	0			Automated Analysis	Lifespan Machine
02032023_Alex	::TK001 (10uM)::20::OP50_HI::lifespan	c::1	1	c	5.01406	3.1875	1.97188	1.99375			TK001 (10uM)			20	18	OP50_HI	lifespan				1	34.0758	7	0.0833333	41.9924	41.9924	0			Automated Analysis	Lifespan Machine
02032023_Alex	::TK001 (10uM)::20::OP50_HI::lifespan	c::1	1	c	5.01406	3.1875	1.97188	1.99375			TK001 (10uM)			20	18	OP50_HI	lifespan				1	35.3258	11.0833	0.0833333	46.4091	46.4091	0			Automated Analysis	Lifespan Machine
02032023_Alex	::TK001 (10uM)::20::OP50_HI::lifespan	c::1	1	c	5.01406	3.1875	1.97188	1.99375			TK001 (10uM)			20	18	OP50_HI	lifespan				1	36.8258	5.83333	0.0833333	46.4091	46.4091	0			Automated Analysis	Lifespan Machine
02032023_Alex	::TK001 (10uM)::20::OP50_HI::lifespan	c::1	1	c	5.01406	3.1875	1.97188	1.99375			TK001 (10uM)			20	18	OP50_HI	lifespan				1	37.0758	4.58333	0.0833333	46.4091	46.4091	0			Automated Analysis	Lifespan Machine
02032023_Alex	::TK001 (10uM)::20::OP50_HI::lifespan	c::1	1	c	5.01406	3.1875	1.97188	1.99375			TK001 (10uM)			20	18	OP50_HI	lifespan				1	37.5758	2.5	0.0833333	46.4091	46.4091	0			Automated Analysis	Lifespan Machine
02032023_Alex	::TK001 (10uM)::20::OP50_HI::lifespan	c::1	1	c	5.01406	3.1875	1.97188	1.99375			TK001 (10uM)			20	18	OP50_HI	lifespan				1	37.6591	5.91667	0.0833333	46.4091	46.4091	0			Automated Analysis	Lifespan Machine
02032023_Alex	::TK001 (10uM)::20::OP50_HI::lifespan	c::1	1	c	5.01406	3.1875	1.97188	1.99375			TK001 (10uM)			20	18	OP50_HI	lifespan				1	38.0758	0.5	0.0833333	46.4091	46.4091	0			Automated Analysis	Lifespan Machine
02032023_Alex	::TK001 (10uM)::20::OP50_HI::lifespan	c::1	1	c	5.01406	3.1875	1.97188	1.99375			TK001 (10uM)			20	18	OP50_HI	lifespan				1	38.9924	9.41667	0.0833333	45.4091	45.4091	0			Automated Analysis	Lifespan Machine
02032023_Alex	::TK001 (10uM)::20::OP50_HI::lifespan	c::1	1	c	5.01406	3.1875	1.97188	1.99375			TK001 (10uM)			20	18	OP50_HI	lifespan				1	39.1591	6.33333	0.0833333	38.8258	41.4091	0			Automated Analysis	Lifespan Machine
02032023_Alex	::TK001 (10uM)::20::OP50_HI::lifespan	c::1	1	c	5.01406	3.1875	1.97188	1.99375			TK001 (10uM)			20	18	OP50_HI	lifespan				1	39.3258	7.91667	0.0833333	39.3258	42.6591	0			Automated Analysis	Lifespan Machine
02032023_Alex	::TK001 (10uM)::20::OP50_HI::lifespan	c::1	1	c	5.01406	3.1875	1.97188	1.99375			TK001 (10uM)			20	18	OP50_HI	lifespan				1	39.3258	8.16667	0.0833333	44.0758	44.0758	0			Automated Analysis	Lifespan Machine
02032023_Alex	::TK001 (10uM)::20::OP50_HI::lifespan	c::1	1	c	5.01406	3.1875	1.97188	1.99375			TK001 (10uM)			20	18	OP50_HI	lifespan				1	39.6591	8.41667	0.0833333	46.3258	46.3258	0			Automated Analysis	Lifespan Machine
02032023_Alex	::TK001 (10uM)::20::OP50_HI::lifespan	c::1	1	c	5.01406	3.1875	1.97188	1.99375			TK001 (10uM)			20	18	OP50_HI	lifespan				1	39.7424	11.1667	0.0833333	46.4091	46.4091	0			Automated Analysis	Lifespan Machine
02032023_Alex	::TK001 (10uM)::20::OP50_HI::lifespan	c::1	1	c	5.01406	3.1875	1.97188	1.99375			TK001 (10uM)			20	18	OP50_HI	lifespan				10	40.3258	8.83333	0.0833333	46.4091	46.4091	1	Escaped machine detection		Automated Analysis	Lifespan Machine
02032023_Alex	::TK001 (10uM)::20::OP50_HI::lifespan	c::1	1	c	5.01406	3.1875	1.97188	1.99375			TK001 (10uM)			20	18	OP50_HI	lifespan				1	40.3258	5.75	0.0833333	46.4091	46.4091	0			Automated Analysis	Lifespan Machine
02032023_Alex	::TK001 (10uM)::20::OP50_HI::lifespan	c::1	1	c	5.01406	3.1875	1.97188	1.99375			TK001 (10uM)			20	18	OP50_HI	lifespan				1	41.5758	9.41667	0.0833333	46.4091	46.4091	0			Automated Analysis	Lifespan Machine
02032023_Alex	::TK001 (10uM)::20::OP50_HI::lifespan	c::1	1	c	5.01406	3.1875	1.97188	1.99375			TK001 (10uM)			20	18	OP50_HI	lifespan				1	41.8258	5.33333	0.0833333	46.4091	46.4091	0			Automated Analysis	Lifespan Machine
02032023_Alex	::TK001 (10uM)::20::OP50_HI::lifespan	c::1	1	c	5.01406	3.1875	1.97188	1.99375			TK001 (10uM)			20	18	OP50_HI	lifespan				1	41.9091	8.5	0.0833333	46.4091	46.4091	0			Automated Analysis	Lifespan Machine
02032023_Alex	::TK001 (10uM)::20::OP50_HI::lifespan	c::1	1	c	5.01406	3.1875	1.97188	1.99375			TK001 (10uM)			20	18	OP50_HI	lifespan				1	42.1591	7.83333	0.0833333	42.2424	46.4091	0			Automated Analysis	Lifespan Machine
02032023_Alex	::TK001 (10uM)::20::OP50_HI::lifespan	c::1	1	c	5.01406	3.1875	1.97188	1.99375			TK001 (10uM)			20	18	OP50_HI	lifespan				1	42.4091	7.5	0.0833333	42.0758	46.4091	0			Automated Analysis	Lifespan Machine
02032023_Alex	::TK001 (10uM)::20::OP50_HI::lifespan	c::1	1	c	5.01406	3.1875	1.97188	1.99375			TK001 (10uM)			20	18	OP50_HI	lifespan				1	43.5758	7	0.0833333	43.1591	46.4091	0			Automated Analysis	Lifespan Machine
02032023_Alex	::TK001 (10uM)::20::OP50_HI::lifespan	c::2	2	c	4.96094	5.31094	1.92188	1.98438			TK001 (10uM)			20	18	OP50_HI	lifespan				1	17.4924	1.58333	0.0833333	46.4091	46.4091	0			Automated Analysis	Lifespan Machine
02032023_Alex	::TK001 (10uM)::20::OP50_HI::lifespan	c::2	2	c	4.96094	5.31094	1.92188	1.98438			TK001 (10uM)			20	18	OP50_HI	lifespan				1	20.9924	2.91667	0.0833333	21.0758	21.0758	0			Automated Analysis	Lifespan Machine
02032023_Alex	::TK001 (10uM)::20::OP50_HI::lifespan	c::2	2	c	4.96094	5.31094	1.92188	1.98438			TK001 (10uM)			20	18	OP50_HI	lifespan				1	23.3258	6.08333	0.0833333	46.4091	46.4091	0			Automated Analysis	Lifespan Machine
02032023_Alex	::TK001 (10uM)::20::OP50_HI::lifespan	c::2	2	c	4.96094	5.31094	1.92188	1.98438			TK001 (10uM)			20	18	OP50_HI	lifespan				1	25.3258	8.66667	0.0833333	46.4091	46.4091	0			Automated Analysis	Lifespan Machine
02032023_Alex	::TK001 (10uM)::20::OP50_HI::lifespan	c::2	2	c	4.96094	5.31094	1.92188	1.98438			TK001 (10uM)			20	18	OP50_HI	lifespan				1	29.8258	5.08333	0.0833333	44.2424	44.2424	0			Automated Analysis	Lifespan Machine
02032023_Alex	::TK001 (10uM)::20::OP50_HI::lifespan	c::2	2	c	4.96094	5.31094	1.92188	1.98438			TK001 (10uM)			20	18	OP50_HI	lifespan				1	29.9924	5.25	0.0833333	46.4091	46.4091	0			Automated Analysis	Lifespan Machine
02032023_Alex	::TK001 (10uM)::20::OP50_HI::lifespan	c::2	2	c	4.96094	5.31094	1.92188	1.98438			TK001 (10uM)			20	18	OP50_HI	lifespan				1	30.7424	4.41667	0.0833333	46.4091	46.4091	0			Automated Analysis	Lifespan Machine
02032023_Alex	::TK001 (10uM)::20::OP50_HI::lifespan	c::2	2	c	4.96094	5.31094	1.92188	1.98438			TK001 (10uM)			20	18	OP50_HI	lifespan				1	31.2424	6.41667	0.0833333	46.4091	46.4091	0			Automated Analysis	Lifespan Machine
02032023_Alex	::TK001 (10uM)::20::OP50_HI::lifespan	c::2	2	c	4.96094	5.31094	1.92188	1.98438			TK001 (10uM)			20	18	OP50_HI	lifespan				1	32.3258	8.83333	0.0833333	46.4091	46.4091	0			Automated Analysis	Lifespan Machine
02032023_Alex	::TK001 (10uM)::20::OP50_HI::lifespan	c::2	2	c	4.96094	5.31094	1.92188	1.98438			TK001 (10uM)			20	18	OP50_HI	lifespan				1	32.9924	11.4167	0.0833333	46.4091	46.4091	0			Automated Analysis	Lifespan Machine
02032023_Alex	::TK001 (10uM)::20::OP50_HI::lifespan	c::2	2	c	4.96094	5.31094	1.92188	1.98438			TK001 (10uM)			20	18	OP50_HI	lifespan				1	35.5758	3.5	0.0833333	46.4091	46.4091	0			Automated Analysis	Lifespan Machine
02032023_Alex	::TK001 (10uM)::20::OP50_HI::lifespan	c::2	2	c	4.96094	5.31094	1.92188	1.98438			TK001 (10uM)			20	18	OP50_HI	lifespan				1	35.9091	10.6667	0.0833333	46.4091	46.4091	0			Automated Analysis	Lifespan Machine
02032023_Alex	::TK001 (10uM)::20::OP50_HI::lifespan	c::2	2	c	4.96094	5.31094	1.92188	1.98438			TK001 (10uM)			20	18	OP50_HI	lifespan				1	39.3258	4.41667	0.0833333	39.4091	39.4091	0			Automated Analysis	Lifespan Machine
02032023_Alex	::TK001 (10uM)::20::OP50_HI::lifespan	c::2	2	c	4.96094	5.31094	1.92188	1.98438			TK001 (10uM)			20	18	OP50_HI	lifespan				1	39.6591	11.6667	0.0833333	46.4091	46.4091	0			Automated Analysis	Lifespan Machine
02032023_Alex	::TK001 (10uM)::20::OP50_HI::lifespan	c::2	2	c	4.96094	5.31094	1.92188	1.98438			TK001 (10uM)			20	18	OP50_HI	lifespan				1	39.7424	3.58333	0.0833333	46.4091	46.4091	0			Automated Analysis	Lifespan Machine
02032023_Alex	::TK001 (10uM)::20::OP50_HI::lifespan	c::2	2	c	4.96094	5.31094	1.92188	1.98438			TK001 (10uM)			20	18	OP50_HI	lifespan				1	41.8258	10.3333	0.0833333	41.8258	41.8258	0			Automated Analysis	Lifespan Machine
02032023_Alex	::TK001 (10uM)::20::OP50_HI::lifespan	c::2	2	c	4.96094	5.31094	1.92188	1.98438			TK001 (10uM)			20	18	OP50_HI	lifespan				1	41.9091	4	0.0833333	41.2424	44.4924	0			Automated Analysis	Lifespan Machine
02032023_Alex	::TK001 (10uM)::20::OP50_HI::lifespan	c::2	2	c	4.96094	5.31094	1.92188	1.98438			TK001 (10uM)			20	18	OP50_HI	lifespan				1	43.0758	7.5	0.0833333	43.0758	43.0758	0			Automated Analysis	Lifespan Machine
02032023_Alex	::TK001 (10uM)::20::OP50_HI::lifespan	c::2	2	c	4.96094	5.31094	1.92188	1.98438			TK001 (10uM)			20	18	OP50_HI	lifespan				1	43.5758	10.3333	0.0833333	42.7424	46.3258	0			Automated Analysis	Lifespan Machine
02032023_Alex	::TK001 (10uM)::20::OP50_HI::lifespan	c::2	2	c	4.96094	5.31094	1.92188	1.98438			TK001 (10uM)			20	18	OP50_HI	lifespan				1	43.5758	9.91667	0.0833333	46.4091	46.4091	0			Automated Analysis	Lifespan Machine
02032023_Alex	::TK001 (10uM)::20::OP50_HI::lifespan	c::2	2	c	4.96094	5.31094	1.92188	1.98438			TK001 (10uM)			20	18	OP50_HI	lifespan				1	43.6591	10.5833	0.0833333	41.5758	46.4091	0			Automated Analysis	Lifespan Machine
02032023_Alex	::TK001 (10uM)::20::OP50_HI::lifespan	c::2	2	c	4.96094	5.31094	1.92188	1.98438			TK001 (10uM)			20	18	OP50_HI	lifespan				1	45.0758	11	0.0833333	44.3258	46.4091	0			Automated Analysis	Lifespan Machine
02032023_Alex	::TK001 (10uM)::20::OP50_HI::lifespan	c::3	3	c	4.9875	7.38594	1.975	1.99063			TK001 (10uM)			20	18	OP50_HI	lifespan				1	21.1591	6.58333	0.0833333	46.4091	46.4091	0			Automated Analysis	Lifespan Machine
02032023_Alex	::TK001 (10uM)::20::OP50_HI::lifespan	c::3	3	c	4.9875	7.38594	1.975	1.99063			TK001 (10uM)			20	18	OP50_HI	lifespan				1	31.1591	3.83333	0.0833333	46.4091	46.4091	0			Automated Analysis	Lifespan Machine
02032023_Alex	::TK001 (10uM)::20::OP50_HI::lifespan	c::3	3	c	4.9875	7.38594	1.975	1.99063			TK001 (10uM)			20	18	OP50_HI	lifespan				1	31.8258	9.58333	0.0833333	46.1591	46.1591	0			Automated Analysis	Lifespan Machine
02032023_Alex	::TK001 (10uM)::20::OP50_HI::lifespan	c::3	3	c	4.9875	7.38594	1.975	1.99063			TK001 (10uM)			20	18	OP50_HI	lifespan				1	35.1591	12	0.0833333	46.4091	46.4091	0			Automated Analysis	Lifespan Machine
02032023_Alex	::TK001 (10uM)::20::OP50_HI::lifespan	c::3	3	c	4.9875	7.38594	1.975	1.99063			TK001 (10uM)			20	18	OP50_HI	lifespan				1	36.0758	5.75	0.0833333	46.4091	46.4091	0			Automated Analysis	Lifespan Machine
02032023_Alex	::TK001 (10uM)::20::OP50_HI::lifespan	c::3	3	c	4.9875	7.38594	1.975	1.99063			TK001 (10uM)			20	18	OP50_HI	lifespan				1	36.9091	7.41667	0.0833333	46.3258	46.3258	0			Automated Analysis	Lifespan Machine
02032023_Alex	::TK001 (10uM)::20::OP50_HI::lifespan	c::3	3	c	4.9875	7.38594	1.975	1.99063			TK001 (10uM)			20	18	OP50_HI	lifespan				1	37.7424	5.58333	0.0833333	46.4091	46.4091	0			Automated Analysis	Lifespan Machine
02032023_Alex	::TK001 (10uM)::20::OP50_HI::lifespan	c::3	3	c	4.9875	7.38594	1.975	1.99063			TK001 (10uM)			20	18	OP50_HI	lifespan				1	39.7424	14.1667	0.0833333	39.7424	39.7424	0			Automated Analysis	Lifespan Machine
02032023_Alex	::TK001 (10uM)::20::OP50_HI::lifespan	c::3	3	c	4.9875	7.38594	1.975	1.99063			TK001 (10uM)			20	18	OP50_HI	lifespan				1	41.2424	7.41667	0.0833333	41.2424	41.2424	0			Automated Analysis	Lifespan Machine
02032023_Alex	::TK001 (10uM)::20::OP50_HI::lifespan	c::3	3	c	4.9875	7.38594	1.975	1.99063			TK001 (10uM)			20	18	OP50_HI	lifespan				1	42.0758	2.58333	0.0833333	45.9091	45.9091	0			Automated Analysis	Lifespan Machine
02032023_Alex	::TK001 (10uM)::20::OP50_HI::lifespan	c::3	3	c	4.9875	7.38594	1.975	1.99063			TK001 (10uM)			20	18	OP50_HI	lifespan				1	43.3258	0.0833333	0.0833333	43.1591	43.4924	0			Automated Analysis	Lifespan Machine
02032023_Alex	::TK001 (10uM)::20::OP50_HI::lifespan	c::3	3	c	4.9875	7.38594	1.975	1.99063			TK001 (10uM)			20	18	OP50_HI	lifespan				1	44.3258	10	0.0833333	41.8258	46.4091	0			Automated Analysis	Lifespan Machine
02032023_Alex	::Rapamycin (100uM)::20::OP50_HI::lifespan	b::0	0	b	2.99531	1.97812	1.98438	1.95625			Rapamycin (100uM)			20	18	OP50_HI	lifespan				1	22.5549	2.75	0.25	24.7216	24.7216	0			Automated Analysis	Lifespan Machine
02032023_Alex	::Rapamycin (100uM)::20::OP50_HI::lifespan	b::0	0	b	2.99531	1.97812	1.98438	1.95625			Rapamycin (100uM)			20	18	OP50_HI	lifespan				1	27.5549	7.41667	0.416667	46.3883	46.3883	0			Automated Analysis	Lifespan Machine
02032023_Alex	::Rapamycin (100uM)::20::OP50_HI::lifespan	b::0	0	b	2.99531	1.97812	1.98438	1.95625			Rapamycin (100uM)			20	18	OP50_HI	lifespan				1	28.9716	6.16667	0.416667	46.3883	46.3883	0			Automated Analysis	Lifespan Machine
02032023_Alex	::Rapamycin (100uM)::20::OP50_HI::lifespan	b::0	0	b	2.99531	1.97812	1.98438	1.95625			Rapamycin (100uM)			20	18	OP50_HI	lifespan				1	28.9716	10.0833	0.416667	46.3883	46.3883	0			Automated Analysis	Lifespan Machine
02032023_Alex	::Rapamycin (100uM)::20::OP50_HI::lifespan	b::0	0	b	2.99531	1.97812	1.98438	1.95625			Rapamycin (100uM)			20	18	OP50_HI	lifespan				1	29.0549	8.5	0.416667	46.3883	46.3883	0			Automated Analysis	Lifespan Machine
02032023_Alex	::Rapamycin (100uM)::20::OP50_HI::lifespan	b::0	0	b	2.99531	1.97812	1.98438	1.95625			Rapamycin (100uM)			20	18	OP50_HI	lifespan				1	29.3049	9.16667	0.416667	46.3883	46.3883	0			Automated Analysis	Lifespan Machine
02032023_Alex	::Rapamycin (100uM)::20::OP50_HI::lifespan	b::0	0	b	2.99531	1.97812	1.98438	1.95625			Rapamycin (100uM)			20	18	OP50_HI	lifespan				1	29.3049	10.0833	0.416667	46.3883	46.3883	0			Automated Analysis	Lifespan Machine
02032023_Alex	::Rapamycin (100uM)::20::OP50_HI::lifespan	b::0	0	b	2.99531	1.97812	1.98438	1.95625			Rapamycin (100uM)			20	18	OP50_HI	lifespan				1	30.3049	5.70833	0.416667	46.3883	46.3883	0			Automated Analysis	Lifespan Machine
02032023_Alex	::Rapamycin (100uM)::20::OP50_HI::lifespan	b::0	0	b	2.99531	1.97812	1.98438	1.95625			Rapamycin (100uM)			20	18	OP50_HI	lifespan				1	31.0549	4.75	0.166667	38.8049	38.8049	0			Automated Analysis	Lifespan Machine
02032023_Alex	::Rapamycin (100uM)::20::OP50_HI::lifespan	b::0	0	b	2.99531	1.97812	1.98438	1.95625			Rapamycin (100uM)			20	18	OP50_HI	lifespan				1	32.5549	8.33333	0.416667	46.3883	46.3883	0			Automated Analysis	Lifespan Machine
02032023_Alex	::Rapamycin (100uM)::20::OP50_HI::lifespan	b::0	0	b	2.99531	1.97812	1.98438	1.95625			Rapamycin (100uM)			20	18	OP50_HI	lifespan				1	34.3049	4.5	0.0833333	46.3883	46.3883	0			Automated Analysis	Lifespan Machine
02032023_Alex	::Rapamycin (100uM)::20::OP50_HI::lifespan	b::0	0	b	2.99531	1.97812	1.98438	1.95625			Rapamycin (100uM)			20	18	OP50_HI	lifespan				1	35.0549	8	0.166667	46.3883	46.3883	0			Automated Analysis	Lifespan Machine
02032023_Alex	::Rapamycin (100uM)::20::OP50_HI::lifespan	b::0	0	b	2.99531	1.97812	1.98438	1.95625			Rapamycin (100uM)			20	18	OP50_HI	lifespan				1	35.0549	7.16667	0.0833333	46.3883	46.3883	0			Automated Analysis	Lifespan Machine
02032023_Alex	::Rapamycin (100uM)::20::OP50_HI::lifespan	b::0	0	b	2.99531	1.97812	1.98438	1.95625			Rapamycin (100uM)			20	18	OP50_HI	lifespan				1	35.7216	13.4167	0.416667	46.3883	46.3883	0			Automated Analysis	Lifespan Machine
02032023_Alex	::Rapamycin (100uM)::20::OP50_HI::lifespan	b::0	0	b	2.99531	1.97812	1.98438	1.95625			Rapamycin (100uM)			20	18	OP50_HI	lifespan				1	37.5549	5.08333	0.0833333	46.3883	46.3883	0			Automated Analysis	Lifespan Machine
02032023_Alex	::Rapamycin (100uM)::20::OP50_HI::lifespan	b::0	0	b	2.99531	1.97812	1.98438	1.95625			Rapamycin (100uM)			20	18	OP50_HI	lifespan				1	38.8049	9.66667	0.166667	38.8049	38.8049	0			Automated Analysis	Lifespan Machine
02032023_Alex	::Rapamycin (100uM)::20::OP50_HI::lifespan	b::0	0	b	2.99531	1.97812	1.98438	1.95625			Rapamycin (100uM)			20	18	OP50_HI	lifespan				1	39.0133	7.875	0.166667	46.3883	46.3883	0			Automated Analysis	Lifespan Machine
02032023_Alex	::Rapamycin (100uM)::20::OP50_HI::lifespan	b::0	0	b	2.99531	1.97812	1.98438	1.95625			Rapamycin (100uM)			20	18	OP50_HI	lifespan				1	39.2216	15	0.416667	46.3883	46.3883	0			Automated Analysis	Lifespan Machine
02032023_Alex	::Rapamycin (100uM)::20::OP50_HI::lifespan	b::0	0	b	2.99531	1.97812	1.98438	1.95625			Rapamycin (100uM)			20	18	OP50_HI	lifespan				1	39.8049	8.33333	0.166667	46.3883	46.3883	0			Automated Analysis	Lifespan Machine
02032023_Alex	::Rapamycin (100uM)::20::OP50_HI::lifespan	b::0	0	b	2.99531	1.97812	1.98438	1.95625			Rapamycin (100uM)			20	18	OP50_HI	lifespan				1	39.9716	6.5	0.166667	39.9716	39.9716	0			Automated Analysis	Lifespan Machine
02032023_Alex	::Rapamycin (100uM)::20::OP50_HI::lifespan	b::0	0	b	2.99531	1.97812	1.98438	1.95625			Rapamycin (100uM)			20	18	OP50_HI	lifespan				1	42.1383	14.5833	0.166667	41.1383	46.3883	0			Automated Analysis	Lifespan Machine
02032023_Alex	::Rapamycin (100uM)::20::OP50_HI::lifespan	b::0	0	b	2.99531	1.97812	1.98438	1.95625			Rapamycin (100uM)			20	18	OP50_HI	lifespan				1	42.8883	17.5833	0.416667	46.3883	46.3883	0			Automated Analysis	Lifespan Machine
02032023_Alex	::Rapamycin (100uM)::20::OP50_HI::lifespan	b::0	0	b	2.99531	1.97812	1.98438	1.95625			Rapamycin (100uM)			20	18	OP50_HI	lifespan				1	43.3883	4.5	0.166667	42.3883	46.3883	0			Automated Analysis	Lifespan Machine
02032023_Alex	::Rapamycin (100uM)::20::OP50_HI::lifespan	b::0	0	b	2.99531	1.97812	1.98438	1.95625			Rapamycin (100uM)			20	18	OP50_HI	lifespan				1	43.4716	20.0833	0.416667	43.4716	43.4716	0			Automated Analysis	Lifespan Machine
02032023_Alex	::Rapamycin (100uM)::20::OP50_HI::lifespan	b::0	0	b	2.99531	1.97812	1.98438	1.95625			Rapamycin (100uM)			20	18	OP50_HI	lifespan				1	43.8883	6.58333	0.166667	43.1383	46.3883	0			Automated Analysis	Lifespan Machine
02032023_Alex	::Rapamycin (100uM)::20::OP50_HI::lifespan	b::1	1	b	2.99531	4.06094	1.98438	1.99063			Rapamycin (100uM)			20	18	OP50_HI	lifespan				1	19.1383	1.5	0.0833333	46.3883	46.3883	0			Automated Analysis	Lifespan Machine
02032023_Alex	::Rapamycin (100uM)::20::OP50_HI::lifespan	b::1	1	b	2.99531	4.06094	1.98438	1.99063			Rapamycin (100uM)			20	18	OP50_HI	lifespan				1	23.6383	6.08333	0.0833333	46.3883	46.3883	0			Automated Analysis	Lifespan Machine
02032023_Alex	::Rapamycin (100uM)::20::OP50_HI::lifespan	b::1	1	b	2.99531	4.06094	1.98438	1.99063			Rapamycin (100uM)			20	18	OP50_HI	lifespan				1	27.9716	6.5	0.0833333	46.3883	46.3883	0			Automated Analysis	Lifespan Machine
02032023_Alex	::Rapamycin (100uM)::20::OP50_HI::lifespan	b::1	1	b	2.99531	4.06094	1.98438	1.99063			Rapamycin (100uM)			20	18	OP50_HI	lifespan				1	28.9716	3.91667	0.0833333	46.3883	46.3883	0			Automated Analysis	Lifespan Machine
02032023_Alex	::Rapamycin (100uM)::20::OP50_HI::lifespan	b::1	1	b	2.99531	4.06094	1.98438	1.99063			Rapamycin (100uM)			20	18	OP50_HI	lifespan				1	31.1383	3.83333	0.0833333	46.3883	46.3883	0			Automated Analysis	Lifespan Machine
02032023_Alex	::Rapamycin (100uM)::20::OP50_HI::lifespan	b::1	1	b	2.99531	4.06094	1.98438	1.99063			Rapamycin (100uM)			20	18	OP50_HI	lifespan				1	31.5549	6.16667	0.0833333	46.3883	46.3883	0			Automated Analysis	Lifespan Machine
02032023_Alex	::Rapamycin (100uM)::20::OP50_HI::lifespan	b::1	1	b	2.99531	4.06094	1.98438	1.99063			Rapamycin (100uM)			20	18	OP50_HI	lifespan				1	31.7216	9.41667	0.0833333	46.3883	46.3883	0			Automated Analysis	Lifespan Machine
02032023_Alex	::Rapamycin (100uM)::20::OP50_HI::lifespan	b::1	1	b	2.99531	4.06094	1.98438	1.99063			Rapamycin (100uM)			20	18	OP50_HI	lifespan				1	31.8883	6	0.0833333	46.3883	46.3883	0			Automated Analysis	Lifespan Machine
02032023_Alex	::Rapamycin (100uM)::20::OP50_HI::lifespan	b::1	1	b	2.99531	4.06094	1.98438	1.99063			Rapamycin (100uM)			20	18	OP50_HI	lifespan				1	32.5549	7.66667	0.0833333	46.3883	46.3883	0			Automated Analysis	Lifespan Machine
02032023_Alex	::Rapamycin (100uM)::20::OP50_HI::lifespan	b::1	1	b	2.99531	4.06094	1.98438	1.99063			Rapamycin (100uM)			20	18	OP50_HI	lifespan				1	33.3883	5.16667	0.0833333	46.3883	46.3883	0			Automated Analysis	Lifespan Machine
02032023_Alex	::Rapamycin (100uM)::20::OP50_HI::lifespan	b::1	1	b	2.99531	4.06094	1.98438	1.99063			Rapamycin (100uM)			20	18	OP50_HI	lifespan				1	33.7216	3.58333	0.0833333	46.3883	46.3883	0			Automated Analysis	Lifespan Machine
02032023_Alex	::Rapamycin (100uM)::20::OP50_HI::lifespan	b::1	1	b	2.99531	4.06094	1.98438	1.99063			Rapamycin (100uM)			20	18	OP50_HI	lifespan				1	34.1383	10.4167	0.0833333	46.3883	46.3883	0			Automated Analysis	Lifespan Machine
02032023_Alex	::Rapamycin (100uM)::20::OP50_HI::lifespan	b::1	1	b	2.99531	4.06094	1.98438	1.99063			Rapamycin (100uM)			20	18	OP50_HI	lifespan				1	34.7216	8.91667	0.0833333	46.3883	46.3883	0			Automated Analysis	Lifespan Machine
02032023_Alex	::Rapamycin (100uM)::20::OP50_HI::lifespan	b::1	1	b	2.99531	4.06094	1.98438	1.99063			Rapamycin (100uM)			20	18	OP50_HI	lifespan				9	35.8049	14.9167	0.0833333	35.8049	35.8049	1	Escaped machine detection		Automated Analysis	Lifespan Machine
02032023_Alex	::Rapamycin (100uM)::20::OP50_HI::lifespan	b::1	1	b	2.99531	4.06094	1.98438	1.99063			Rapamycin (100uM)			20	18	OP50_HI	lifespan				1	37.6383	0.166667	0.0833333	46.3883	46.3883	0			Automated Analysis	Lifespan Machine
02032023_Alex	::Rapamycin (100uM)::20::OP50_HI::lifespan	b::1	1	b	2.99531	4.06094	1.98438	1.99063			Rapamycin (100uM)			20	18	OP50_HI	lifespan				1	37.8883	16.9167	0.0833333	46.3883	46.3883	0			Automated Analysis	Lifespan Machine
02032023_Alex	::Rapamycin (100uM)::20::OP50_HI::lifespan	b::1	1	b	2.99531	4.06094	1.98438	1.99063			Rapamycin (100uM)			20	18	OP50_HI	lifespan				1	38.8049	9.91667	0.0833333	38.9716	38.9716	0			Automated Analysis	Lifespan Machine
02032023_Alex	::Rapamycin (100uM)::20::OP50_HI::lifespan	b::1	1	b	2.99531	4.06094	1.98438	1.99063			Rapamycin (100uM)			20	18	OP50_HI	lifespan				1	45.1383	20.3333	0.0833333	45.1383	45.1383	0			Automated Analysis	Lifespan Machine
02032023_Alex	::Rapamycin (100uM)::20::OP50_HI::lifespan	b::2	2	b	2.98438	6.13594	1.96875	1.99063			Rapamycin (100uM)			20	18	OP50_HI	lifespan				1	29.8049	1.83333	0.0833333	46.3883	46.3883	0			Automated Analysis	Lifespan Machine
02032023_Alex	::Rapamycin (100uM)::20::OP50_HI::lifespan	b::2	2	b	2.98438	6.13594	1.96875	1.99063			Rapamycin (100uM)			20	18	OP50_HI	lifespan				1	30.2216	9.41667	0.0833333	46.3883	46.3883	0			Automated Analysis	Lifespan Machine
02032023_Alex	::Rapamycin (100uM)::20::OP50_HI::lifespan	b::2	2	b	2.98438	6.13594	1.96875	1.99063			Rapamycin (100uM)			20	18	OP50_HI	lifespan				1	30.3049	10.3333	0.0833333	46.3883	46.3883	0			Automated Analysis	Lifespan Machine
02032023_Alex	::Rapamycin (100uM)::20::OP50_HI::lifespan	b::2	2	b	2.98438	6.13594	1.96875	1.99063			Rapamycin (100uM)			20	18	OP50_HI	lifespan				1	30.8883	6.58333	0.0833333	30.3049	31.8883	0			Automated Analysis	Lifespan Machine
02032023_Alex	::Rapamycin (100uM)::20::OP50_HI::lifespan	b::2	2	b	2.98438	6.13594	1.96875	1.99063			Rapamycin (100uM)			20	18	OP50_HI	lifespan				1	31.1383	12.1667	0.0833333	46.3883	46.3883	0			Automated Analysis	Lifespan Machine
02032023_Alex	::Rapamycin (100uM)::20::OP50_HI::lifespan	b::2	2	b	2.98438	6.13594	1.96875	1.99063			Rapamycin (100uM)			20	18	OP50_HI	lifespan				1	33.7216	13	0.0833333	46.3883	46.3883	0			Automated Analysis	Lifespan Machine
02032023_Alex	::Rapamycin (100uM)::20::OP50_HI::lifespan	b::2	2	b	2.98438	6.13594	1.96875	1.99063			Rapamycin (100uM)			20	18	OP50_HI	lifespan				1	33.7216	18.4167	0.0833333	46.3883	46.3883	0			Automated Analysis	Lifespan Machine
02032023_Alex	::Rapamycin (100uM)::20::OP50_HI::lifespan	b::2	2	b	2.98438	6.13594	1.96875	1.99063			Rapamycin (100uM)			20	18	OP50_HI	lifespan				1	35.2216	14.1667	0.0833333	46.3883	46.3883	0			Automated Analysis	Lifespan Machine
02032023_Alex	::Rapamycin (100uM)::20::OP50_HI::lifespan	b::2	2	b	2.98438	6.13594	1.96875	1.99063			Rapamycin (100uM)			20	18	OP50_HI	lifespan				1	36.6383	5.16667	0.0833333	46.3883	46.3883	0			Automated Analysis	Lifespan Machine
02032023_Alex	::Rapamycin (100uM)::20::OP50_HI::lifespan	b::2	2	b	2.98438	6.13594	1.96875	1.99063			Rapamycin (100uM)			20	18	OP50_HI	lifespan				1	37.9716	11.8333	0.0833333	46.3883	46.3883	0			Automated Analysis	Lifespan Machine
02032023_Alex	::Rapamycin (100uM)::20::OP50_HI::lifespan	b::2	2	b	2.98438	6.13594	1.96875	1.99063			Rapamycin (100uM)			20	18	OP50_HI	lifespan				1	38.3049	8.41667	0.0833333	38.3883	38.3883	0			Automated Analysis	Lifespan Machine
02032023_Alex	::Rapamycin (100uM)::20::OP50_HI::lifespan	b::2	2	b	2.98438	6.13594	1.96875	1.99063			Rapamycin (100uM)			20	18	OP50_HI	lifespan				1	39.2216	15.6667	0.0833333	39.3883	39.3883	0			Automated Analysis	Lifespan Machine
02032023_Alex	::Rapamycin (100uM)::20::OP50_HI::lifespan	b::2	2	b	2.98438	6.13594	1.96875	1.99063			Rapamycin (100uM)			20	18	OP50_HI	lifespan				1	41.3049	10.1667	0.0833333	41.3883	41.8883	0			Automated Analysis	Lifespan Machine
02032023_Alex	::Rapamycin (100uM)::20::OP50_HI::lifespan	b::2	2	b	2.98438	6.13594	1.96875	1.99063			Rapamycin (100uM)			20	18	OP50_HI	lifespan				1	42.3049	7.33333	0.0833333	42.4716	42.4716	0			Automated Analysis	Lifespan Machine
02032023_Alex	::Rapamycin (100uM)::20::OP50_HI::lifespan	b::2	2	b	2.98438	6.13594	1.96875	1.99063			Rapamycin (100uM)			20	18	OP50_HI	lifespan				1	43.7216	16	0.0833333	46.3883	46.3883	0			Automated Analysis	Lifespan Machine
02032023_Alex	::Rapamycin (100uM)::20::OP50_HI::lifespan	b::3	3	b	3.00781	8.25	1.95938	1.96875			Rapamycin (100uM)			20	18	OP50_HI	lifespan				1	27.2216	7.66667	0.0833333	46.3883	46.3883	0			Automated Analysis	Lifespan Machine
02032023_Alex	::Rapamycin (100uM)::20::OP50_HI::lifespan	b::3	3	b	3.00781	8.25	1.95938	1.96875			Rapamycin (100uM)			20	18	OP50_HI	lifespan				1	29.8883	7.08333	0.0833333	46.3883	46.3883	0			Automated Analysis	Lifespan Machine
02032023_Alex	::Rapamycin (100uM)::20::OP50_HI::lifespan	b::3	3	b	3.00781	8.25	1.95938	1.96875			Rapamycin (100uM)			20	18	OP50_HI	lifespan				1	32.1383	11.1667	0.0833333	46.3883	46.3883	0			Automated Analysis	Lifespan Machine
02032023_Alex	::Rapamycin (100uM)::20::OP50_HI::lifespan	b::3	3	b	3.00781	8.25	1.95938	1.96875			Rapamycin (100uM)			20	18	OP50_HI	lifespan				1	34.8883	11.1667	0.0833333	46.3883	46.3883	0			Automated Analysis	Lifespan Machine
02032023_Alex	::Rapamycin (100uM)::20::OP50_HI::lifespan	b::3	3	b	3.00781	8.25	1.95938	1.96875			Rapamycin (100uM)			20	18	OP50_HI	lifespan				1	35.8883	11.9167	0.0833333	46.3883	46.3883	0			Automated Analysis	Lifespan Machine
02032023_Alex	::Rapamycin (100uM)::20::OP50_HI::lifespan	b::3	3	b	3.00781	8.25	1.95938	1.96875			Rapamycin (100uM)			20	18	OP50_HI	lifespan				1	36.3049	13.5	0.0833333	46.3883	46.3883	0			Automated Analysis	Lifespan Machine
02032023_Alex	::Rapamycin (100uM)::20::OP50_HI::lifespan	b::3	3	b	3.00781	8.25	1.95938	1.96875			Rapamycin (100uM)			20	18	OP50_HI	lifespan				1	37.9716	14.6667	0.0833333	38.0549	38.0549	0			Automated Analysis	Lifespan Machine
02032023_Alex	::Rapamycin (100uM)::20::OP50_HI::lifespan	b::3	3	b	3.00781	8.25	1.95938	1.96875			Rapamycin (100uM)			20	18	OP50_HI	lifespan				1	38.3049	12	0.0833333	38.4716	38.4716	0			Automated Analysis	Lifespan Machine
02032023_Alex	::Rapamycin (100uM)::20::OP50_HI::lifespan	b::3	3	b	3.00781	8.25	1.95938	1.96875			Rapamycin (100uM)			20	18	OP50_HI	lifespan				1	38.6383	7.25	0.0833333	46.3883	46.3883	0			Automated Analysis	Lifespan Machine
02032023_Alex	::Rapamycin (100uM)::20::OP50_HI::lifespan	b::3	3	b	3.00781	8.25	1.95938	1.96875			Rapamycin (100uM)			20	18	OP50_HI	lifespan				1	40.0549	6.58333	0.0833333	39.0549	46.3883	0			Automated Analysis	Lifespan Machine
02032023_Alex	::Rapamycin (100uM)::20::OP50_HI::lifespan	b::3	3	b	3.00781	8.25	1.95938	1.96875			Rapamycin (100uM)			20	18	OP50_HI	lifespan				1	40.3883	17.5	0.0833333	40.3883	42.6383	0			Automated Analysis	Lifespan Machine
02032023_Alex	::Rapamycin (100uM)::20::OP50_HI::lifespan	b::3	3	b	3.00781	8.25	1.95938	1.96875			Rapamycin (100uM)			20	18	OP50_HI	lifespan				1	40.8883	13.8333	0.0833333	40.8883	40.8883	0			Automated Analysis	Lifespan Machine
02032023_Alex	::Rapamycin (100uM)::20::OP50_HI::lifespan	b::3	3	b	3.00781	8.25	1.95938	1.96875			Rapamycin (100uM)			20	18	OP50_HI	lifespan				1	42.2216	8.08333	0.0833333	46.3883	46.3883	0			Automated Analysis	Lifespan Machine
02032023_Alex	::TK001 (100uM)::20::OP50_HI::lifespan	a::0	0	a	1.10156	0.978125	1.99063	1.95625			TK001 (100uM)			20	18	OP50_HI	lifespan				1	23.1174	1.08333	0.0833333	46.3674	46.3674	0			Automated Analysis	Lifespan Machine
02032023_Alex	::TK001 (100uM)::20::OP50_HI::lifespan	a::0	0	a	1.10156	0.978125	1.99063	1.95625			TK001 (100uM)			20	18	OP50_HI	lifespan				1	26.7008	4.75	0.0833333	46.0341	46.0341	0			Automated Analysis	Lifespan Machine
02032023_Alex	::TK001 (100uM)::20::OP50_HI::lifespan	a::0	0	a	1.10156	0.978125	1.99063	1.95625			TK001 (100uM)			20	18	OP50_HI	lifespan				1	28.7008	3.41667	0.0833333	46.3674	46.3674	0			Automated Analysis	Lifespan Machine
02032023_Alex	::TK001 (100uM)::20::OP50_HI::lifespan	a::0	0	a	1.10156	0.978125	1.99063	1.95625			TK001 (100uM)			20	18	OP50_HI	lifespan				1	28.7841	5.91667	0.0833333	46.3674	46.3674	0			Automated Analysis	Lifespan Machine
02032023_Alex	::TK001 (100uM)::20::OP50_HI::lifespan	a::0	0	a	1.10156	0.978125	1.99063	1.95625			TK001 (100uM)			20	18	OP50_HI	lifespan				1	31.4508	5	0.0833333	46.3674	46.3674	0			Automated Analysis	Lifespan Machine
02032023_Alex	::TK001 (100uM)::20::OP50_HI::lifespan	a::0	0	a	1.10156	0.978125	1.99063	1.95625			TK001 (100uM)			20	18	OP50_HI	lifespan				1	34.0341	3.58333	0.0833333	46.3674	46.3674	0			Automated Analysis	Lifespan Machine
02032023_Alex	::TK001 (100uM)::20::OP50_HI::lifespan	a::0	0	a	1.10156	0.978125	1.99063	1.95625			TK001 (100uM)			20	18	OP50_HI	lifespan				1	34.4508	6.75	0.0833333	46.3674	46.3674	0			Automated Analysis	Lifespan Machine
02032023_Alex	::TK001 (100uM)::20::OP50_HI::lifespan	a::0	0	a	1.10156	0.978125	1.99063	1.95625			TK001 (100uM)			20	18	OP50_HI	lifespan				1	37.0341	9.58333	0.0833333	46.3674	46.3674	0			Automated Analysis	Lifespan Machine
02032023_Alex	::TK001 (100uM)::20::OP50_HI::lifespan	a::0	0	a	1.10156	0.978125	1.99063	1.95625			TK001 (100uM)			20	18	OP50_HI	lifespan				1	37.2008	5	0.0833333	46.3674	46.3674	0			Automated Analysis	Lifespan Machine
02032023_Alex	::TK001 (100uM)::20::OP50_HI::lifespan	a::0	0	a	1.10156	0.978125	1.99063	1.95625			TK001 (100uM)			20	18	OP50_HI	lifespan				1	37.9508	6.66667	0.0833333	38.1174	38.1174	0			Automated Analysis	Lifespan Machine
02032023_Alex	::TK001 (100uM)::20::OP50_HI::lifespan	a::0	0	a	1.10156	0.978125	1.99063	1.95625			TK001 (100uM)			20	18	OP50_HI	lifespan				1	38.2841	4.58333	0.0833333	46.3674	46.3674	0			Automated Analysis	Lifespan Machine
02032023_Alex	::TK001 (100uM)::20::OP50_HI::lifespan	a::0	0	a	1.10156	0.978125	1.99063	1.95625			TK001 (100uM)			20	18	OP50_HI	lifespan				1	39.5341	5.16667	0.0833333	39.5341	39.5341	0			Automated Analysis	Lifespan Machine
02032023_Alex	::TK001 (100uM)::20::OP50_HI::lifespan	a::0	0	a	1.10156	0.978125	1.99063	1.95625			TK001 (100uM)			20	18	OP50_HI	lifespan				1	40.2008	7.75	0.0833333	46.3674	46.3674	0			Automated Analysis	Lifespan Machine
02032023_Alex	::TK001 (100uM)::20::OP50_HI::lifespan	a::0	0	a	1.10156	0.978125	1.99063	1.95625			TK001 (100uM)			20	18	OP50_HI	lifespan				1	40.4508	5.25	0.0833333	46.3674	46.3674	0			Automated Analysis	Lifespan Machine
02032023_Alex	::TK001 (100uM)::20::OP50_HI::lifespan	a::0	0	a	1.10156	0.978125	1.99063	1.95625			TK001 (100uM)			20	18	OP50_HI	lifespan				1	40.7841	9.91667	0.0833333	39.7841	46.3674	0			Automated Analysis	Lifespan Machine
02032023_Alex	::TK001 (100uM)::20::OP50_HI::lifespan	a::0	0	a	1.10156	0.978125	1.99063	1.95625			TK001 (100uM)			20	18	OP50_HI	lifespan				1	41.0341	6	0.0833333	41.1174	41.1174	0			Automated Analysis	Lifespan Machine
02032023_Alex	::TK001 (100uM)::20::OP50_HI::lifespan	a::0	0	a	1.10156	0.978125	1.99063	1.95625			TK001 (100uM)			20	18	OP50_HI	lifespan				1	41.7841	6.5	0.0833333	41.9508	46.3674	0			Automated Analysis	Lifespan Machine
02032023_Alex	::TK001 (100uM)::20::OP50_HI::lifespan	a::0	0	a	1.10156	0.978125	1.99063	1.95625			TK001 (100uM)			20	18	OP50_HI	lifespan				1	42.3674	6.08333	0.0833333	46.3674	46.3674	0			Automated Analysis	Lifespan Machine
02032023_Alex	::TK001 (100uM)::20::OP50_HI::lifespan	a::0	0	a	1.10156	0.978125	1.99063	1.95625			TK001 (100uM)			20	18	OP50_HI	lifespan				1	42.5341	10.8333	0.0833333	42.7008	42.7008	0			Automated Analysis	Lifespan Machine
02032023_Alex	::TK001 (100uM)::20::OP50_HI::lifespan	a::0	0	a	1.10156	0.978125	1.99063	1.95625			TK001 (100uM)			20	18	OP50_HI	lifespan				1	44.1174	6.5	0.0833333	44.5341	46.3674	0			Automated Analysis	Lifespan Machine
02032023_Alex	::TK001 (100uM)::20::OP50_HI::lifespan	a::0	0	a	1.10156	0.978125	1.99063	1.95625			TK001 (100uM)			20	18	OP50_HI	lifespan				1	44.2008	12.1667	0.0833333	46.3674	46.3674	0			Automated Analysis	Lifespan Machine
02032023_Alex	::TK001 (100uM)::20::OP50_HI::lifespan	a::1	1	a	1.05	3.13594	1.9875	1.98438			TK001 (100uM)			20	18	OP50_HI	lifespan				1	24.3674	8.33333	0.0833333	46.3674	46.3674	0			Automated Analysis	Lifespan Machine
02032023_Alex	::TK001 (100uM)::20::OP50_HI::lifespan	a::1	1	a	1.05	3.13594	1.9875	1.98438			TK001 (100uM)			20	18	OP50_HI	lifespan				1	26.8674	4.08333	0.0833333	46.3674	46.3674	0			Automated Analysis	Lifespan Machine
02032023_Alex	::TK001 (100uM)::20::OP50_HI::lifespan	a::1	1	a	1.05	3.13594	1.9875	1.98438			TK001 (100uM)			20	18	OP50_HI	lifespan				1	31.0341	5.16667	0.0833333	46.3674	46.3674	0			Automated Analysis	Lifespan Machine
02032023_Alex	::TK001 (100uM)::20::OP50_HI::lifespan	a::1	1	a	1.05	3.13594	1.9875	1.98438			TK001 (100uM)			20	18	OP50_HI	lifespan				1	32.2008	1.41667	0.0833333	35.3674	35.3674	0			Automated Analysis	Lifespan Machine
02032023_Alex	::TK001 (100uM)::20::OP50_HI::lifespan	a::1	1	a	1.05	3.13594	1.9875	1.98438			TK001 (100uM)			20	18	OP50_HI	lifespan				1	35.1174	11.3333	0.166667	46.3674	46.3674	0			Automated Analysis	Lifespan Machine
02032023_Alex	::TK001 (100uM)::20::OP50_HI::lifespan	a::1	1	a	1.05	3.13594	1.9875	1.98438			TK001 (100uM)			20	18	OP50_HI	lifespan				1	35.2008	9.41667	0.166667	46.3674	46.3674	0			Automated Analysis	Lifespan Machine
02032023_Alex	::TK001 (100uM)::20::OP50_HI::lifespan	a::1	1	a	1.05	3.13594	1.9875	1.98438			TK001 (100uM)			20	18	OP50_HI	lifespan				1	35.2841	7.83333	0.166667	46.3674	46.3674	0			Automated Analysis	Lifespan Machine
02032023_Alex	::TK001 (100uM)::20::OP50_HI::lifespan	a::1	1	a	1.05	3.13594	1.9875	1.98438			TK001 (100uM)			20	18	OP50_HI	lifespan				1	35.5758	19.2083	0.166667	35.5758	35.5758	0			Automated Analysis	Lifespan Machine
02032023_Alex	::TK001 (100uM)::20::OP50_HI::lifespan	a::1	1	a	1.05	3.13594	1.9875	1.98438			TK001 (100uM)			20	18	OP50_HI	lifespan				1	37.1174	7.33333	0.166667	46.3674	46.3674	0			Automated Analysis	Lifespan Machine
02032023_Alex	::TK001 (100uM)::20::OP50_HI::lifespan	a::1	1	a	1.05	3.13594	1.9875	1.98438			TK001 (100uM)			20	18	OP50_HI	lifespan				1	37.6174	9.16667	0.166667	46.3674	46.3674	0			Automated Analysis	Lifespan Machine
02032023_Alex	::TK001 (100uM)::20::OP50_HI::lifespan	a::1	1	a	1.05	3.13594	1.9875	1.98438			TK001 (100uM)			20	18	OP50_HI	lifespan				1	37.7841	5.83333	0.166667	46.3674	46.3674	0			Automated Analysis	Lifespan Machine
02032023_Alex	::TK001 (100uM)::20::OP50_HI::lifespan	a::1	1	a	1.05	3.13594	1.9875	1.98438			TK001 (100uM)			20	18	OP50_HI	lifespan				1	38.7008	5.5	0.166667	46.3674	46.3674	0			Automated Analysis	Lifespan Machine
02032023_Alex	::TK001 (100uM)::20::OP50_HI::lifespan	a::1	1	a	1.05	3.13594	1.9875	1.98438			TK001 (100uM)			20	18	OP50_HI	lifespan				1	39.0341	9	0.166667	46.3674	46.3674	0			Automated Analysis	Lifespan Machine
02032023_Alex	::TK001 (100uM)::20::OP50_HI::lifespan	a::1	1	a	1.05	3.13594	1.9875	1.98438			TK001 (100uM)			20	18	OP50_HI	lifespan				1	39.0341	11.3333	0.166667	46.3674	46.3674	0			Automated Analysis	Lifespan Machine
02032023_Alex	::TK001 (100uM)::20::OP50_HI::lifespan	a::1	1	a	1.05	3.13594	1.9875	1.98438			TK001 (100uM)			20	18	OP50_HI	lifespan				1	39.6174	7.25	0.166667	46.3674	46.3674	0			Automated Analysis	Lifespan Machine
02032023_Alex	::TK001 (100uM)::20::OP50_HI::lifespan	a::1	1	a	1.05	3.13594	1.9875	1.98438			TK001 (100uM)			20	18	OP50_HI	lifespan				1	39.9508	5.58333	0.166667	40.1174	40.1174	0			Automated Analysis	Lifespan Machine
02032023_Alex	::TK001 (100uM)::20::OP50_HI::lifespan	a::1	1	a	1.05	3.13594	1.9875	1.98438			TK001 (100uM)			20	18	OP50_HI	lifespan				1	40.2841	2.08333	0.0833333	46.3674	46.3674	0			Automated Analysis	Lifespan Machine
02032023_Alex	::TK001 (100uM)::20::OP50_HI::lifespan	a::1	1	a	1.05	3.13594	1.9875	1.98438			TK001 (100uM)			20	18	OP50_HI	lifespan				1	41.0341	2.08333	0.0833333	46.3674	46.3674	0			Automated Analysis	Lifespan Machine
02032023_Alex	::TK001 (100uM)::20::OP50_HI::lifespan	a::1	1	a	1.05	3.13594	1.9875	1.98438			TK001 (100uM)			20	18	OP50_HI	lifespan				1	42.0341	6.25	0.0833333	42.0341	42.0341	0			Automated Analysis	Lifespan Machine
02032023_Alex	::TK001 (100uM)::20::OP50_HI::lifespan	a::1	1	a	1.05	3.13594	1.9875	1.98438			TK001 (100uM)			20	18	OP50_HI	lifespan				1	43.3674	9.58333	0.166667	41.8674	46.3674	0			Automated Analysis	Lifespan Machine
02032023_Alex	::TK001 (100uM)::20::OP50_HI::lifespan	a::1	1	a	1.05	3.13594	1.9875	1.98438			TK001 (100uM)			20	18	OP50_HI	lifespan				1	43.3674	17.9167	0.166667	39.5341	46.3674	0			Automated Analysis	Lifespan Machine
02032023_Alex	::TK001 (100uM)::20::OP50_HI::lifespan	a::1	1	a	1.05	3.13594	1.9875	1.98438			TK001 (100uM)			20	18	OP50_HI	lifespan				1	43.8674	20.75	0.166667	42.9508	46.3674	0			Automated Analysis	Lifespan Machine
02032023_Alex	::TK001 (100uM)::20::OP50_HI::lifespan	a::1	1	a	1.05	3.13594	1.9875	1.98438			TK001 (100uM)			20	18	OP50_HI	lifespan				1	44.3674	7.25	0.0833333	46.3674	46.3674	0			Automated Analysis	Lifespan Machine
02032023_Alex	::TK001 (100uM)::20::OP50_HI::lifespan	a::1	1	a	1.05	3.13594	1.9875	1.98438			TK001 (100uM)			20	18	OP50_HI	lifespan				1	45.0341	12	0.166667	45.1174	45.1174	0			Automated Analysis	Lifespan Machine
02032023_Alex	::TK001 (100uM)::20::OP50_HI::lifespan	a::2	2	a	1.02656	5.23594	1.99063	1.99063			TK001 (100uM)			20	18	OP50_HI	lifespan				1	27.5341	2.25	0.0833333	46.3674	46.3674	0			Automated Analysis	Lifespan Machine
02032023_Alex	::TK001 (100uM)::20::OP50_HI::lifespan	a::2	2	a	1.02656	5.23594	1.99063	1.99063			TK001 (100uM)			20	18	OP50_HI	lifespan				1	30.6174	3	0.0833333	31.9508	31.9508	0			Automated Analysis	Lifespan Machine
02032023_Alex	::TK001 (100uM)::20::OP50_HI::lifespan	a::2	2	a	1.02656	5.23594	1.99063	1.99063			TK001 (100uM)			20	18	OP50_HI	lifespan				1	31.8674	1.16667	0.0833333	46.3674	46.3674	0			Automated Analysis	Lifespan Machine
02032023_Alex	::TK001 (100uM)::20::OP50_HI::lifespan	a::2	2	a	1.02656	5.23594	1.99063	1.99063			TK001 (100uM)			20	18	OP50_HI	lifespan				1	33.7841	3.16667	0.0833333	46.3674	46.3674	0			Automated Analysis	Lifespan Machine
02032023_Alex	::TK001 (100uM)::20::OP50_HI::lifespan	a::2	2	a	1.02656	5.23594	1.99063	1.99063			TK001 (100uM)			20	18	OP50_HI	lifespan				1	35.2841	10	0.0833333	46.3674	46.3674	0			Automated Analysis	Lifespan Machine
02032023_Alex	::TK001 (100uM)::20::OP50_HI::lifespan	a::2	2	a	1.02656	5.23594	1.99063	1.99063			TK001 (100uM)			20	18	OP50_HI	lifespan				1	37.5341	9.33333	0.0833333	46.3674	46.3674	0			Automated Analysis	Lifespan Machine
02032023_Alex	::TK001 (100uM)::20::OP50_HI::lifespan	a::2	2	a	1.02656	5.23594	1.99063	1.99063			TK001 (100uM)			20	18	OP50_HI	lifespan				1	38.6174	8.75	0.0833333	46.3674	46.3674	0			Automated Analysis	Lifespan Machine
02032023_Alex	::TK001 (100uM)::20::OP50_HI::lifespan	a::2	2	a	1.02656	5.23594	1.99063	1.99063			TK001 (100uM)			20	18	OP50_HI	lifespan				1	39.8674	0.25	0.0833333	46.3674	46.3674	0			Automated Analysis	Lifespan Machine
02032023_Alex	::TK001 (100uM)::20::OP50_HI::lifespan	a::2	2	a	1.02656	5.23594	1.99063	1.99063			TK001 (100uM)			20	18	OP50_HI	lifespan				1	40.4508	8.75	0.0833333	46.3674	46.3674	0			Automated Analysis	Lifespan Machine
02032023_Alex	::TK001 (100uM)::20::OP50_HI::lifespan	a::2	2	a	1.02656	5.23594	1.99063	1.99063			TK001 (100uM)			20	18	OP50_HI	lifespan				1	40.5341	9.83333	0.0833333	40.5341	40.5341	0			Automated Analysis	Lifespan Machine
02032023_Alex	::TK001 (100uM)::20::OP50_HI::lifespan	a::2	2	a	1.02656	5.23594	1.99063	1.99063			TK001 (100uM)			20	18	OP50_HI	lifespan				1	41.9508	9.75	0.0833333	46.2008	46.2008	0			Automated Analysis	Lifespan Machine
02032023_Alex	::TK001 (100uM)::20::OP50_HI::lifespan	a::2	2	a	1.02656	5.23594	1.99063	1.99063			TK001 (100uM)			20	18	OP50_HI	lifespan				1	42.1174	8.16667	0.0833333	42.1174	42.1174	0			Automated Analysis	Lifespan Machine
02032023_Alex	::TK001 (100uM)::20::OP50_HI::lifespan	a::2	2	a	1.02656	5.23594	1.99063	1.99063			TK001 (100uM)			20	18	OP50_HI	lifespan				1	43.4508	12	0.0833333	43.4508	43.4508	0			Automated Analysis	Lifespan Machine
02032023_Alex	::TK001 (100uM)::20::OP50_HI::lifespan	a::3	3	a	1.05156	7.43281	1.99063	1.98438			TK001 (100uM)			20	18	OP50_HI	lifespan				1	25.5341	1.58333	0.0833333	46.3674	46.3674	0			Automated Analysis	Lifespan Machine
02032023_Alex	::TK001 (100uM)::20::OP50_HI::lifespan	a::3	3	a	1.05156	7.43281	1.99063	1.98438			TK001 (100uM)			20	18	OP50_HI	lifespan				1	28.8674	2.5	0.0833333	46.3674	46.3674	0			Automated Analysis	Lifespan Machine
02032023_Alex	::TK001 (100uM)::20::OP50_HI::lifespan	a::3	3	a	1.05156	7.43281	1.99063	1.98438			TK001 (100uM)			20	18	OP50_HI	lifespan				1	36.8674	10.5833	0.0833333	46.3674	46.3674	0			Automated Analysis	Lifespan Machine
02032023_Alex	::TK001 (100uM)::20::OP50_HI::lifespan	a::3	3	a	1.05156	7.43281	1.99063	1.98438			TK001 (100uM)			20	18	OP50_HI	lifespan				1	37.2841	3.33333	0.0833333	46.3674	46.3674	0			Automated Analysis	Lifespan Machine
02032023_Alex	::TK001 (100uM)::20::OP50_HI::lifespan	a::3	3	a	1.05156	7.43281	1.99063	1.98438			TK001 (100uM)			20	18	OP50_HI	lifespan				1	42.3674	19.5833	0.0833333	42.3674	42.3674	0			Automated Analysis	Lifespan Machine
02032023_Alex	::TK001 (100uM)::20::OP50_HI::lifespan	a::3	3	a	1.05156	7.43281	1.99063	1.98438			TK001 (100uM)			20	18	OP50_HI	lifespan				1	43.5341	5.41667	0.0833333	46.3674	46.3674	0			Automated Analysis	Lifespan Machine
02032023_Alex	::Cont::20::OP50_HI::lifespan	d::0	0	d	5.99531	2.01094	1.99063	1.99063			Cont			20	18	OP50_HI	lifespan				1	28.5091	2.16667	0.0833333	46.4779	46.4779	0			Automated Analysis	Lifespan Machine
02032023_Alex	::Cont::20::OP50_HI::lifespan	d::0	0	d	5.99531	2.01094	1.99063	1.99063			Cont			20	18	OP50_HI	lifespan				1	31.2591	9.91667	0.0833333	46.4779	46.4779	0			Automated Analysis	Lifespan Machine
02032023_Alex	::Cont::20::OP50_HI::lifespan	d::0	0	d	5.99531	2.01094	1.99063	1.99063			Cont			20	18	OP50_HI	lifespan				1	31.4258	4.83333	0.0833333	46.4779	46.4779	0			Automated Analysis	Lifespan Machine
02032023_Alex	::Cont::20::OP50_HI::lifespan	d::0	0	d	5.99531	2.01094	1.99063	1.99063			Cont			20	18	OP50_HI	lifespan				1	33.5091	9.41667	0.0833333	46.4779	46.4779	0			Automated Analysis	Lifespan Machine
02032023_Alex	::Cont::20::OP50_HI::lifespan	d::0	0	d	5.99531	2.01094	1.99063	1.99063			Cont			20	18	OP50_HI	lifespan				1	33.5924	10.75	0.0833333	46.4779	46.4779	0			Automated Analysis	Lifespan Machine
02032023_Alex	::Cont::20::OP50_HI::lifespan	d::0	0	d	5.99531	2.01094	1.99063	1.99063			Cont			20	18	OP50_HI	lifespan				1	34.9258	10.1667	0.0833333	46.4779	46.4779	0			Automated Analysis	Lifespan Machine
02032023_Alex	::Cont::20::OP50_HI::lifespan	d::0	0	d	5.99531	2.01094	1.99063	1.99063			Cont			20	18	OP50_HI	lifespan				1	35.0924	5.5	0.0833333	46.4779	46.4779	0			Automated Analysis	Lifespan Machine
02032023_Alex	::Cont::20::OP50_HI::lifespan	d::0	0	d	5.99531	2.01094	1.99063	1.99063			Cont			20	18	OP50_HI	lifespan				1	36.2591	0.75	0.0833333	46.4779	46.4779	0			Automated Analysis	Lifespan Machine
02032023_Alex	::Cont::20::OP50_HI::lifespan	d::0	0	d	5.99531	2.01094	1.99063	1.99063			Cont			20	18	OP50_HI	lifespan				1	36.4258	6.08333	0.0833333	46.4779	46.4779	0			Automated Analysis	Lifespan Machine
02032023_Alex	::Cont::20::OP50_HI::lifespan	d::0	0	d	5.99531	2.01094	1.99063	1.99063			Cont			20	18	OP50_HI	lifespan				1	38.7591	2.91667	0.0833333	46.4779	46.4779	0			Automated Analysis	Lifespan Machine
02032023_Alex	::Cont::20::OP50_HI::lifespan	d::0	0	d	5.99531	2.01094	1.99063	1.99063			Cont			20	18	OP50_HI	lifespan				1	42.6758	12.1667	0.0833333	46.4779	46.4779	0			Automated Analysis	Lifespan Machine
02032023_Alex	::Cont::20::OP50_HI::lifespan	d::0	0	d	5.99531	2.01094	1.99063	1.99063			Cont			20	18	OP50_HI	lifespan				1	44.3424	10.3333	0.0833333	44.1758	46.4779	0			Automated Analysis	Lifespan Machine
02032023_Alex	::Cont::20::OP50_HI::lifespan	d::1	1	d	5.99375	4.18594	1.9875	1.99063			Cont			20	18	OP50_HI	lifespan				1	15.9258	0.666667	0.0833333	46.4779	46.4779	0			Automated Analysis	Lifespan Machine
02032023_Alex	::Cont::20::OP50_HI::lifespan	d::1	1	d	5.99375	4.18594	1.9875	1.99063			Cont			20	18	OP50_HI	lifespan				1	20.1758	0.416667	0.0833333	46.4779	46.4779	0			Automated Analysis	Lifespan Machine
02032023_Alex	::Cont::20::OP50_HI::lifespan	d::1	1	d	5.99375	4.18594	1.9875	1.99063			Cont			20	18	OP50_HI	lifespan				1	20.8424	2.25	0.0833333	46.4779	46.4779	0			Automated Analysis	Lifespan Machine
02032023_Alex	::Cont::20::OP50_HI::lifespan	d::1	1	d	5.99375	4.18594	1.9875	1.99063			Cont			20	18	OP50_HI	lifespan				1	21.0924	1.83333	0.0833333	46.4779	46.4779	0			Automated Analysis	Lifespan Machine
02032023_Alex	::Cont::20::OP50_HI::lifespan	d::1	1	d	5.99375	4.18594	1.9875	1.99063			Cont			20	18	OP50_HI	lifespan				1	27.1758	6.41667	0.0833333	46.4779	46.4779	0			Automated Analysis	Lifespan Machine
02032023_Alex	::Cont::20::OP50_HI::lifespan	d::1	1	d	5.99375	4.18594	1.9875	1.99063			Cont			20	18	OP50_HI	lifespan				1	30.2591	4.75	0.0833333	46.4779	46.4779	0			Automated Analysis	Lifespan Machine
02032023_Alex	::Cont::20::OP50_HI::lifespan	d::1	1	d	5.99375	4.18594	1.9875	1.99063			Cont			20	18	OP50_HI	lifespan				1	30.3424	5.41667	0.0833333	46.4779	46.4779	0			Automated Analysis	Lifespan Machine
02032023_Alex	::Cont::20::OP50_HI::lifespan	d::1	1	d	5.99375	4.18594	1.9875	1.99063			Cont			20	18	OP50_HI	lifespan				1	32.9258	14.8333	0.0833333	33.0924	33.0924	0			Automated Analysis	Lifespan Machine
02032023_Alex	::Cont::20::OP50_HI::lifespan	d::1	1	d	5.99375	4.18594	1.9875	1.99063			Cont			20	18	OP50_HI	lifespan				1	32.9258	6	0.0833333	46.4779	46.4779	0			Automated Analysis	Lifespan Machine
02032023_Alex	::Cont::20::OP50_HI::lifespan	d::1	1	d	5.99375	4.18594	1.9875	1.99063			Cont			20	18	OP50_HI	lifespan				1	33.9258	4.08333	0.0833333	46.4779	46.4779	0			Automated Analysis	Lifespan Machine
02032023_Alex	::Cont::20::OP50_HI::lifespan	d::1	1	d	5.99375	4.18594	1.9875	1.99063			Cont			20	18	OP50_HI	lifespan				1	35.0924	1.66667	0.0833333	46.4779	46.4779	0			Automated Analysis	Lifespan Machine
02032023_Alex	::Cont::20::OP50_HI::lifespan	d::1	1	d	5.99375	4.18594	1.9875	1.99063			Cont			20	18	OP50_HI	lifespan				1	36.5924	10.5833	0.0833333	46.4779	46.4779	0			Automated Analysis	Lifespan Machine
02032023_Alex	::Cont::20::OP50_HI::lifespan	d::1	1	d	5.99375	4.18594	1.9875	1.99063			Cont			20	18	OP50_HI	lifespan				1	36.5924	11.3333	0.0833333	46.4779	46.4779	0			Automated Analysis	Lifespan Machine
02032023_Alex	::Cont::20::OP50_HI::lifespan	d::1	1	d	5.99375	4.18594	1.9875	1.99063			Cont			20	18	OP50_HI	lifespan				1	38.5091	7.83333	0.0833333	46.4779	46.4779	0			Automated Analysis	Lifespan Machine
02032023_Alex	::Cont::20::OP50_HI::lifespan	d::1	1	d	5.99375	4.18594	1.9875	1.99063			Cont			20	18	OP50_HI	lifespan				1	39.3424	3.66667	0.0833333	46.4779	46.4779	0			Automated Analysis	Lifespan Machine
02032023_Alex	::Cont::20::OP50_HI::lifespan	d::1	1	d	5.99375	4.18594	1.9875	1.99063			Cont			20	18	OP50_HI	lifespan				1	40.7591	14.1667	0.0833333	46.4779	46.4779	0			Automated Analysis	Lifespan Machine
02032023_Alex	::Cont::20::OP50_HI::lifespan	d::1	1	d	5.99375	4.18594	1.9875	1.99063			Cont			20	18	OP50_HI	lifespan				1	40.8424	11	0.0833333	41.0091	41.0091	0			Automated Analysis	Lifespan Machine
02032023_Alex	::Cont::20::OP50_HI::lifespan	d::1	1	d	5.99375	4.18594	1.9875	1.99063			Cont			20	18	OP50_HI	lifespan				1	41.2591	16.4167	0.0833333	41.4258	46.4779	0			Automated Analysis	Lifespan Machine
02032023_Alex	::Cont::20::OP50_HI::lifespan	d::1	1	d	5.99375	4.18594	1.9875	1.99063			Cont			20	18	OP50_HI	lifespan				1	41.7591	17.5833	0.0833333	46.4779	46.4779	0			Automated Analysis	Lifespan Machine
02032023_Alex	::Cont::20::OP50_HI::lifespan	d::1	1	d	5.99375	4.18594	1.9875	1.99063			Cont			20	18	OP50_HI	lifespan				1	44.4258	16.0833	0.0833333	46.4779	46.4779	0			Automated Analysis	Lifespan Machine
02032023_Alex	::Cont::20::OP50_HI::lifespan	d::2	2	d	6.18906	6.18594	1.88437	1.98438			Cont			20	18	OP50_HI	lifespan				1	14.5508	0	0.0833333	46.4779	46.4779	0			Automated Analysis	Lifespan Machine
02032023_Alex	::Cont::20::OP50_HI::lifespan	d::2	2	d	6.18906	6.18594	1.88437	1.98438			Cont			20	18	OP50_HI	lifespan				1	19.4258	2.33333	0.0833333	46.4779	46.4779	0			Automated Analysis	Lifespan Machine
02032023_Alex	::Cont::20::OP50_HI::lifespan	d::2	2	d	6.18906	6.18594	1.88437	1.98438			Cont			20	18	OP50_HI	lifespan				1	19.6758	3.08333	0.0833333	46.4779	46.4779	0			Automated Analysis	Lifespan Machine
02032023_Alex	::Cont::20::OP50_HI::lifespan	d::2	2	d	6.18906	6.18594	1.88437	1.98438			Cont			20	18	OP50_HI	lifespan				1	20.9258	0.166667	0.0833333	46.4779	46.4779	0			Automated Analysis	Lifespan Machine
02032023_Alex	::Cont::20::OP50_HI::lifespan	d::2	2	d	6.18906	6.18594	1.88437	1.98438			Cont			20	18	OP50_HI	lifespan				1	20.9258	0.75	0.0833333	46.4779	46.4779	0			Automated Analysis	Lifespan Machine
02032023_Alex	::Cont::20::OP50_HI::lifespan	d::2	2	d	6.18906	6.18594	1.88437	1.98438			Cont			20	18	OP50_HI	lifespan				1	22.4258	4.5	0.0833333	46.4779	46.4779	0			Automated Analysis	Lifespan Machine
02032023_Alex	::Cont::20::OP50_HI::lifespan	d::2	2	d	6.18906	6.18594	1.88437	1.98438			Cont			20	18	OP50_HI	lifespan				1	23.6758	3.41667	0.0833333	46.4779	46.4779	0			Automated Analysis	Lifespan Machine
02032023_Alex	::Cont::20::OP50_HI::lifespan	d::2	2	d	6.18906	6.18594	1.88437	1.98438			Cont			20	18	OP50_HI	lifespan				1	26.4258	3.66667	0.0833333	46.4779	46.4779	0			Automated Analysis	Lifespan Machine
02032023_Alex	::Cont::20::OP50_HI::lifespan	d::2	2	d	6.18906	6.18594	1.88437	1.98438			Cont			20	18	OP50_HI	lifespan				1	31.0091	9.5	0.0833333	46.4779	46.4779	0			Automated Analysis	Lifespan Machine
02032023_Alex	::Cont::20::OP50_HI::lifespan	d::2	2	d	6.18906	6.18594	1.88437	1.98438			Cont			20	18	OP50_HI	lifespan				1	32.5924	11.4167	0.0833333	46.4779	46.4779	0			Automated Analysis	Lifespan Machine
02032023_Alex	::Cont::20::OP50_HI::lifespan	d::2	2	d	6.18906	6.18594	1.88437	1.98438			Cont			20	18	OP50_HI	lifespan				1	35.1758	10.6667	0.0833333	46.4779	46.4779	0			Automated Analysis	Lifespan Machine
02032023_Alex	::Cont::20::OP50_HI::lifespan	d::2	2	d	6.18906	6.18594	1.88437	1.98438			Cont			20	18	OP50_HI	lifespan				1	37.7591	11	0.0833333	46.4779	46.4779	0			Automated Analysis	Lifespan Machine
02032023_Alex	::Cont::20::OP50_HI::lifespan	d::2	2	d	6.18906	6.18594	1.88437	1.98438			Cont			20	18	OP50_HI	lifespan				1	42.3424	9.5	0.0833333	46.4779	46.4779	0			Automated Analysis	Lifespan Machine
02032023_Alex	::Cont::20::OP50_HI::lifespan	d::2	2	d	6.18906	6.18594	1.88437	1.98438			Cont			20	18	OP50_HI	lifespan				1	44.5924	21.0833	0.0833333	43.4258	46.4779	0			Automated Analysis	Lifespan Machine
02032023_Alex	::Cont::20::OP50_HI::lifespan	d::2	2	d	6.18906	6.18594	1.88437	1.98438			Cont			20	18	OP50_HI	lifespan				1	45.0924	15.5	0.0833333	46.4779	46.4779	0			Automated Analysis	Lifespan Machine
02032023_Alex	::Cont::20::OP50_HI::lifespan	d::3	3	d	6.18906	8.33125	1.88437	1.98125			Cont			20	18	OP50_HI	lifespan				1	19.0091	2.91667	0.0833333	46.4779	46.4779	0			Automated Analysis	Lifespan Machine
02032023_Alex	::Cont::20::OP50_HI::lifespan	d::3	3	d	6.18906	8.33125	1.88437	1.98125			Cont			20	18	OP50_HI	lifespan				1	26.8424	3.08333	0.0833333	46.4779	46.4779	0			Automated Analysis	Lifespan Machine
02032023_Alex	::Cont::20::OP50_HI::lifespan	d::3	3	d	6.18906	8.33125	1.88437	1.98125			Cont			20	18	OP50_HI	lifespan				1	29.5091	6.08333	0.0833333	46.4779	46.4779	0			Automated Analysis	Lifespan Machine
02032023_Alex	::Cont::20::OP50_HI::lifespan	d::3	3	d	6.18906	8.33125	1.88437	1.98125			Cont			20	18	OP50_HI	lifespan				1	30.3424	10.75	0.0833333	46.4779	46.4779	0			Automated Analysis	Lifespan Machine
02032023_Alex	::Cont::20::OP50_HI::lifespan	d::3	3	d	6.18906	8.33125	1.88437	1.98125			Cont			20	18	OP50_HI	lifespan				1	31.9258	8.25	0.0833333	46.4779	46.4779	0			Automated Analysis	Lifespan Machine
02032023_Alex	::Cont::20::OP50_HI::lifespan	d::3	3	d	6.18906	8.33125	1.88437	1.98125			Cont			20	18	OP50_HI	lifespan				1	34.0091	6.75	0.0833333	34.1758	34.1758	0			Automated Analysis	Lifespan Machine
02032023_Alex	::Cont::20::OP50_HI::lifespan	d::3	3	d	6.18906	8.33125	1.88437	1.98125			Cont			20	18	OP50_HI	lifespan				1	34.7591	9	0.0833333	46.4779	46.4779	0			Automated Analysis	Lifespan Machine
02032023_Alex	::Cont::20::OP50_HI::lifespan	d::3	3	d	6.18906	8.33125	1.88437	1.98125			Cont			20	18	OP50_HI	lifespan				1	35.7591	10.75	0.0833333	46.4779	46.4779	0			Automated Analysis	Lifespan Machine
02032023_Alex	::Cont::20::OP50_HI::lifespan	d::3	3	d	6.18906	8.33125	1.88437	1.98125			Cont			20	18	OP50_HI	lifespan				1	39.0924	15.4167	0.0833333	46.4779	46.4779	0			Automated Analysis	Lifespan Machine
02032023_Alex	::Cont::20::OP50_HI::lifespan	d::3	3	d	6.18906	8.33125	1.88437	1.98125			Cont			20	18	OP50_HI	lifespan				1	39.9258	4.66667	0.0833333	46.4779	46.4779	0			Automated Analysis	Lifespan Machine
02032023_Alex	::Cont::20::OP50_HI::lifespan	d::3	3	d	6.18906	8.33125	1.88437	1.98125			Cont			20	18	OP50_HI	lifespan				1	44.8424	11.3333	0.0833333	44.8424	44.8424	0			Automated Analysis	Lifespan Machine
